# Supplementary material for: Understanding the Holobiont: Crosstalk Between Gut Microbiota and Mitochondria During Long Exercise in Horse
Source: Front Mol Biosci. 2021 Apr 8;8:656204. doi: 10.3389/fmolb.2021.656204 (PMC8063112; doi:10.3389/fmolb.2021.656204)
Supplement: Supplementary file 3 [file table2.xlsx]

## Sheet: Table S2
	Table S2. Consensus list of genes related to mitochondria obtained as described in the Supplementary information. Gene description, gene localizations and gene types were determined according to IPA (https://www.qiagenbioinformatics.com/products/ingenuity-pathway-analysis).
	Gene symbol	Gene description	Gene localization	Gene type
	AACS	acetoacetyl-CoA synthetase	cytoplasm	enzyme
	AADAT	aminoadipate aminotransferase	cytoplasm	enzyme
	AARD	alanine and arginine rich domain containing protein	other	other
	AARS2	alanyl-tRNA synthetase 2, mitochondrial	cytoplasm	enzyme
	AASS	aminoadipate-semialdehyde synthase	cytoplasm	enzyme
	ABAT	4-aminobutyrate aminotransferase	cytoplasm	enzyme
	ABCA13	ATP binding cassette subfamily A member 13	extracellular space	transporter
	ABCA8	ATP binding cassette subfamily A member 8	plasma membrane	transporter
	ABCA9	ATP binding cassette subfamily A member 9	cytoplasm	transporter
	ABCB10	ATP binding cassette subfamily B member 10	cytoplasm	transporter
	ABCB6	ATP binding cassette subfamily B member 6 (Langereis blood group)	cytoplasm	transporter
	ABCB7	ATP binding cassette subfamily B member 7	cytoplasm	transporter
	ABCB8	ATP binding cassette subfamily B member 8	cytoplasm	transporter
	ABCB9	ATP binding cassette subfamily B member 9	cytoplasm	transporter
	ABCC12	ATP binding cassette subfamily C member 1	plasma membrane	transporter
	ABCD1	ATP binding cassette subfamily C member 12	cytoplasm	transporter
	ABCD2	ATP binding cassette subfamily D member 1	plasma membrane	transporter
	ABCD3	ATP binding cassette subfamily D member 2	cytoplasm	transporter
	ABCE1	ATP binding cassette subfamily D member 3	cytoplasm	transporter
	ABCF2	ATP binding cassette subfamily E member 1	cytoplasm	transporter
	ABCG2	ATP binding cassette subfamily F member 2	cytoplasm	transporter
	ABH1	ATP binding cassette subfamily G member 2 (Junior blood group)	plasma membrane	transporter
	ABHD10	abhydrolase domain containing 10, depalmitoylase	cytoplasm	enzyme
	ABHD11	abhydrolase domain containing 11	cytoplasm	enzyme
	ABHD16A	abhydrolase domain containing 16A, phospholipase	other	other
	ABHD17A	abhydrolase domain containing 17A, depalmitoylase	plasma membrane	enzyme
	ABHD17B	abhydrolase domain containing 17B, depalmitoylase	plasma membrane	peptidase
	ABHD17C	abhydrolase domain containing 17C, depalmitoylase	plasma membrane	enzyme
	AC092143.1
	ACAA1	acetyl-CoA acyltransferase 1	cytoplasm	enzyme
	ACAA2	acetyl-CoA acyltransferase 2	cytoplasm	enzyme
	ACACA	acetyl-CoA carboxylase alpha	cytoplasm	enzyme
	ACACB	acetyl-CoA carboxylase beta	cytoplasm	enzyme
	ACAD10	acyl-CoA dehydrogenase family member 10	cytoplasm	enzyme
	ACAD11	acyl-CoA dehydrogenase family member 11	cytoplasm	enzyme
	ACAD8	acyl-CoA dehydrogenase family member 8	cytoplasm	enzyme
	ACAD9	acyl-CoA dehydrogenase family member 9	cytoplasm	enzyme
	ACADL	acyl-CoA dehydrogenase long chain	cytoplasm	enzyme
	ACADM	acyl-CoA dehydrogenase medium chain	cytoplasm	enzyme
	ACADS	acyl-CoA dehydrogenase short chain	cytoplasm	enzyme
	ACADSB	acyl-CoA dehydrogenase short/branched chain	cytoplasm	enzyme
	ACADVL	acyl-CoA dehydrogenase very long chain	cytoplasm	enzyme
	ACAT1	acetyl-CoA acetyltransferase 1	cytoplasm	enzyme
	ACAT2	acetyl-CoA acetyltransferase 2	cytoplasm	enzyme
	ACBD3	acyl-CoA binding domain containing 3	cytoplasm	other
	ACCS	1-aminocyclopropane-1-carboxylate synthase homolog (inactive)	other	enzyme
	ACLY	ATP citrate lyase	cytoplasm	enzyme
	ACN9	succinate dehydrogenase complex assembly factor 3	cytoplasm	other
	ACO1	aconitase 1	cytoplasm	enzyme
	ACO2	aconitase 2	cytoplasm	enzyme
	ACOD1	aconitate decarboxylase 1	cytoplasm	enzyme
	ACOT1	acyl-CoA thioesterase 1	cytoplasm	enzyme
	ACOT12	acyl-CoA thioesterase 12	cytoplasm	enzyme
	ACOT13	acyl-CoA thioesterase 13	cytoplasm	enzyme
	ACOT2	acyl-CoA thioesterase 2	cytoplasm	enzyme
	ACOT4	acyl-CoA thioesterase 4	cytoplasm	enzyme
	ACOT7	acyl-CoA thioesterase 7	cytoplasm	enzyme
	ACOT8	acyl-CoA thioesterase 8	cytoplasm	enzyme
	ACOT9	acyl-CoA thioesterase 9	cytoplasm	enzyme
	ACOX1	acyl-CoA oxidase 1	cytoplasm	enzyme
	ACOX3	acyl-CoA oxidase 3, pristanoyl	cytoplasm	enzyme
	ACP6	acid phosphatase 6, lysophosphatidic	cytoplasm	phosphatase
	ACSBG1	acyl-CoA synthetase bubblegum family member 1	cytoplasm	enzyme
	ACSBG2	acyl-CoA synthetase bubblegum family member 2	cytoplasm	enzyme
	ACSF2	acyl-CoA synthetase family member 2	cytoplasm	enzyme
	ACSF3	acyl-CoA synthetase family member 3	cytoplasm	enzyme
	ACSL1	acyl-CoA synthetase long chain family member 1	cytoplasm	enzyme
	ACSL3	acyl-CoA synthetase long chain family member 3	cytoplasm	enzyme
	ACSL4	acyl-CoA synthetase long chain family member 4	cytoplasm	enzyme
	ACSL5	acyl-CoA synthetase long chain family member 5	cytoplasm	enzyme
	ACSL6	acyl-CoA synthetase long chain family member 6	cytoplasm	enzyme
	ACSM1	acyl-CoA synthetase medium chain family member 1	cytoplasm	enzyme
	ACSM2A	acyl-CoA synthetase medium chain family member 2A	cytoplasm	enzyme
	ACSM2B	acyl-CoA synthetase medium chain family member 2B	cytoplasm	enzyme
	ACSM3	acyl-CoA synthetase medium chain family member 3	cytoplasm	enzyme
	ACSM4	acyl-CoA synthetase medium chain family member 4	cytoplasm	enzyme
	ACSM5	acyl-CoA synthetase medium chain family member 5	other	enzyme
	ACSM6	acyl-CoA synthetase medium chain family member 6	other	other
	ACSS1	acyl-CoA synthetase short chain family member 1	cytoplasm	enzyme
	ACSS2	acyl-CoA synthetase short chain family member 2	cytoplasm	enzyme
	ACSS3	acyl-CoA synthetase short chain family member 3	cytoplasm	enzyme
	ACTB	actin beta	cytoplasm	other
	ACTN1	actinin alpha 1	cytoplasm	transcription regulator
	ACYP1	acylphosphatase 1	cytoplasm	enzyme
	ACYP2	acylphosphatase 2	cytoplasm	enzyme
	ADCK1	aarF domain containing kinase 1	cytoplasm	kinase
	ADCK2	aarF domain containing kinase 2	cytoplasm	kinase
	ADCK3	coenzyme Q8A	cytoplasm	kinase
	ADCK4	coenzyme Q8B	cytoplasm	kinase
	ADCK5	aarF domain containing kinase 5	cytoplasm	kinase
	ADCY10	adenylate cyclase 10	cytoplasm	enzyme
	ADGB	androglobin	other	other
	ADGRL2	adhesion G protein-coupled receptor L2	plasma membrane	G-protein coupled receptor
	ADH1A	alcohol dehydrogenase 1A (class I), alpha polypeptide	cytoplasm	enzyme
	ADH1B	alcohol dehydrogenase 1B (class I), beta polypeptide	cytoplasm	enzyme
	ADH1C	alcohol dehydrogenase 1C (class I), gamma polypeptide	cytoplasm	enzyme
	ADH4	alcohol dehydrogenase 4 (class II), pi polypeptide	cytoplasm	enzyme
	ADH5	alcohol dehydrogenase 5 (class III), chi polypeptide	cytoplasm	enzyme
	ADH6	alcohol dehydrogenase 6 (class V)	cytoplasm	enzyme
	ADH7	alcohol dehydrogenase 7 (class IV), mu or sigma polypeptide	cytoplasm	enzyme
	ADHFE1	alcohol dehydrogenase iron containing 1	cytoplasm	enzyme
	ADO	2-aminoethanethiol dioxygenase	cytoplasm	enzyme
	ADPRHL2	ADP-ribosylserine hydrolase	cytoplasm	enzyme
	AFG1L	AFG1 like ATPase	cytoplasm	other
	AFG3L2	AFG3 like matrix AAA peptidase subunit 2	cytoplasm	peptidase
	AGK	acylglycerol kinase	cytoplasm	kinase
	AGMAT	agmatinase	cytoplasm	enzyme
	AGPAT4	1-acylglycerol-3-phosphate O-acyltransferase 4	cytoplasm	enzyme
	AGPAT5	1-acylglycerol-3-phosphate O-acyltransferase 5	cytoplasm	enzyme
	AGR2	anterior gradient 2, protein disulphide isomerase family member	extracellular space	other
	AGXT	alanine--glyoxylate and serine--pyruvate aminotransferase	cytoplasm	enzyme
	AGXT2	alanine--glyoxylate aminotransferase 2	cytoplasm	enzyme
	AHCYL1	adenosylhomocysteinase like 1	cytoplasm	enzyme
	AIFM1	apoptosis inducing factor mitochondria associated 1	cytoplasm	enzyme
	AIFM2	apoptosis inducing factor mitochondria associated 2	cytoplasm	enzyme
	AIFM3	apoptosis inducing factor mitochondria associated 3	cytoplasm	enzyme
	AK2	adenylate kinase 2	cytoplasm	kinase
	AK3	adenylate kinase 3	cytoplasm	kinase
	AK4	adenylate kinase 4	cytoplasm	kinase
	AK9	adenylate kinase 9	nucleus	kinase
	AKAP1	A-kinase anchoring protein 1	cytoplasm	other
	AKAP10	A-kinase anchoring protein 10	cytoplasm	other
	AKR1B1	aldo-keto reductase family 1 member B	cytoplasm	enzyme
	AKR1B10	aldo-keto reductase family 1 member B10	cytoplasm	enzyme
	AKR1B15	aldo-keto reductase family 1 member B15	cytoplasm	enzyme
	AKR1C1	aldo-keto reductase family 1 member C2	cytoplasm	enzyme
	AKR1C2	aldo-keto reductase family 1 member C2	cytoplasm	enzyme
	AKR1C3	aldo-keto reductase family 1 member C3	cytoplasm	enzyme
	AKR1C4	aldo-keto reductase family 1 member C4	cytoplasm	enzyme
	AKR1D1	aldo-keto reductase family 1 member D1	cytoplasm	enzyme
	AKR7A2	aldo-keto reductase family 7 member A2	cytoplasm	enzyme
	AKT
	AKT1	AKT serine/threonine kinase 1	cytoplasm	kinase
	ALAD	aminolevulinate dehydratase	cytoplasm	enzyme
	ALAS1	5'-aminolevulinate synthase 1	cytoplasm	enzyme
	ALAS2	5'-aminolevulinate synthase 2	cytoplasm	enzyme
	ALDH18A1	aldehyde dehydrogenase 18 family member A1	cytoplasm	kinase
	ALDH1B1	aldehyde dehydrogenase 1 family member B1	cytoplasm	enzyme
	ALDH1L1	aldehyde dehydrogenase 1 family member L1	cytoplasm	enzyme
	ALDH1L2	aldehyde dehydrogenase 1 family member L2	cytoplasm	enzyme
	ALDH2	aldehyde dehydrogenase 2 family member	cytoplasm	enzyme
	ALDH3A2	aldehyde dehydrogenase 3 family member A2	cytoplasm	enzyme
	ALDH4A1	aldehyde dehydrogenase 4 family member A1	cytoplasm	enzyme
	ALDH5A1	aldehyde dehydrogenase 5 family member A1	cytoplasm	enzyme
	ALDH6A1	aldehyde dehydrogenase 6 family member A1	cytoplasm	enzyme
	ALDH7A1	aldehyde dehydrogenase 7 family member A1	cytoplasm	enzyme
	ALDH9A1	aldehyde dehydrogenase 9 family member A1	cytoplasm	enzyme
	ALG5	ALG5 dolichyl-phosphate beta-glucosyltransferase	cytoplasm	enzyme
	ALKBH1	alkB homolog 1, histone H2A dioxygenase	cytoplasm	enzyme
	ALKBH3	alkB homolog 3, alpha-ketoglutaratedependent dioxygenase	nucleus	enzyme
	ALKBH7	alkB homolog 7	cytoplasm	other
	AMACR	alpha-methylacyl-CoA racemase	cytoplasm	enzyme
	AMBRA1	autophagy and beclin 1 regulator 1	cytoplasm	other
	AMPD2	adenosine monophosphate deaminase 2	cytoplasm	enzyme
	AMT	aminomethyltransferase	cytoplasm	enzyme
	ANGEL2	angel homolog 2	nucleus	other
	ANKRD44	ankyrin repeat domain 44	other	other
	ANKRD61	ankyrin repeat domain 61	nucleus	transcription regulator
	ANPEP	alanyl aminopeptidase, membrane	plasma membrane	peptidase
	ANXA1	annexin A1	plasma membrane	enzyme
	ANXA10	annexin A10	cytoplasm	other
	ANXA2	annexin A2	plasma membrane	other
	ANXA6	annexin A6	plasma membrane	ion channel
	AOX1	aldehyde oxidase 1	cytoplasm	enzyme
	AP2B1	adaptor related protein complex 2 subunit beta 1	plasma membrane	transporter
	AP2M1	adaptor related protein complex 2 subunit mu 1	cytoplasm	other
	APAF1	apoptotic peptidase activating factor 1	cytoplasm	other
	APEX1	apurinic/apyrimidinic endodeoxyribonuclease 1	nucleus	enzyme
	APEX2	apurinic/apyrimidinic endodeoxyribonuclease 2	nucleus	enzyme
	APOA1BP	NAD(P)HX epimerase	extracellular space	enzyme
	APOO	apolipoprotein O	extracellular space	other
	APOOL	apolipoprotein O like	extracellular space	other
	APOPT1	cytochrome c oxidase assembly factor 8	cytoplasm	other
	APTX	aprataxin	nucleus	phosphatase
	ARF5	ADP ribosylation factor 5	cytoplasm	enzyme
	ARG1	arginase 1	cytoplasm	enzyme
	ARG2	arginase 2	cytoplasm	enzyme
	ARGLU1	arginine and glutamate rich 1	other	other
	ARL2	ADP ribosylation factor like GTPase 2	cytoplasm	enzyme
	ARL2BP	ADP ribosylation factor like GTPase 2 binding protein	cytoplasm	transcription regulator
	ARL8B	ADP ribosylation factor like GTPase 8B	plasma membrane	enzyme
	ARMC1	armadillo repeat containing 1	cytoplasm	other
	ARMC10	armadillo repeat containing 10	cytoplasm	other
	ARMCX1	armadillo repeat containing X-linked 1	other	other
	ARMCX2	armadillo repeat containing X-linked 2	other	other
	ARMCX3	armadillo repeat containing X-linked 3	cytoplasm	other
	ARMS2	age-related maculopathy susceptibility 2	cytoplasm	other
	ASAH1	N-acylsphingosine amidohydrolase 1	cytoplasm	enzyme
	ASAH2	N-acylsphingosine amidohydrolase 2	cytoplasm	enzyme
	ASB9	ankyrin repeat and SOCS box containing 9	nucleus	transcription regulator
	ASPDH	aspartate dehydrogenase domain containing	other	other
	ASS1	argininosuccinate synthase 1	cytoplasm	enzyme
	ATAD1	ATPase family AAA domain containing 1	plasma membrane	enzyme
	ATAD3A	ATPase family AAA domain containing 3A	cytoplasm	other
	ATAD3B	ATPase family AAA domain containing 3B	nucleus	other
	ATCAY	ATCAY kinesin light chain interacting caytaxin	plasma membrane	other
	ATG14	autophagy related 14	cytoplasm	other
	ATG2B	autophagy related 2B	nucleus	other
	ATG4D	autophagy related 4D cysteine peptidase	cytoplasm	peptidase
	ATIC	5-aminoimidazole-4-carboxamide ribonucleotide formyltransferase/IMP cyclohydrolase	cytoplasm	enzyme
	ATP10D	ATPase phospholipid transporting 10D (putative)	cytoplasm	transporter
	ATP12A	ATPase H+/K+ transporting non-gastric alpha2 subunit	plasma membrane	transporter
	ATP13A1	ATPase 13A1	extracellular space	transporter
	ATP4A	ATPase H+/K+ transporting subunit alpha	plasma membrane	transporter
	ATP4B	ATPase H+/K+ transporting subunit beta	plasma membrane	transporter
	ATP5A1	ATP synthase F1 subunit alpha	cytoplasm	transporter
	ATP5B	ATP synthase F1 subunit beta	cytoplasm	transporter
	ATP5C1	ATP synthase F1 subunit gamma	cytoplasm	transporter
	ATP5D	ATP synthase F1 subunit delta	cytoplasm	transporter
	ATP5E	ATP synthase F1 subunit epsilon	cytoplasm	other
	ATP5F1	ATP synthase peripheral stalk-membrane subunit b	cytoplasm	transporter
	ATP5F1A	ATP synthase F1 subunit alpha	cytoplasm	transporter
	ATP5F1B	ATP synthase F1 subunit beta	cytoplasm	transporter
	ATP5F1C	ATP synthase F1 subunit gamma	cytoplasm	transporter
	ATP5F1D	ATP synthase F1 subunit delta	cytoplasm	transporter
	ATP5F1E	ATP synthase F1 subunit epsilon	cytoplasm	other
	ATP5F1EP2	ATP synthase F1 subunit epsilon pseudogene 2	cytoplasm	other
	ATP5G1	ATP synthase membrane subunit c locus 1	cytoplasm	transporter
	ATP5G2	ATP synthase membrane subunit c locus 2	cytoplasm	transporter
	ATP5G3	ATP synthase membrane subunit c locus 3	cytoplasm	transporter
	ATP5H	ATP synthase peripheral stalk subunit d	cytoplasm	enzyme
	ATP5I	ATP synthase membrane subunit e	cytoplasm	transporter
	ATP5IF1	ATP synthase inhibitory factor subunit 1	cytoplasm	other
	ATP5J	ATP synthase peripheral stalk subunit F6	cytoplasm	transporter
	ATP5J2	ATP synthase membrane subunit f	cytoplasm	transporter
	ATP5J2-PTCD1	ATP5MF-PTCD1 readthrough	cytoplasm	other
	ATP5L	ATP synthase membrane subunit g	cytoplasm	enzyme
	ATP5MC1	ATP synthase membrane subunit c locus 1	cytoplasm	transporter
	ATP5MC2	ATP synthase membrane subunit c locus 2	cytoplasm	transporter
	ATP5MC3	ATP synthase membrane subunit c locus 3	cytoplasm	transporter
	ATP5MD	ATP synthase membrane subunit DAPIT	cytoplasm	other
	ATP5ME	ATP synthase membrane subunit e	cytoplasm	transporter
	ATP5MF	ATP synthase membrane subunit f	cytoplasm	transporter
	ATP5MG	ATP synthase membrane subunit g	cytoplasm	enzyme
	ATP5MGL	ATP synthase membrane subunit g like	cytoplasm	other
	ATP5MPL	ATP synthase membrane subunit 6.8PL	cytoplasm	other
	ATP5O	ATP synthase peripheral stalk subunit OSCP	cytoplasm	transporter
	ATP5PB	ATP synthase peripheral stalk-membrane subunit b	cytoplasm	transporter
	ATP5PD	ATP synthase peripheral stalk subunit d	cytoplasm	enzyme
	ATP5PF	ATP synthase peripheral stalk subunit F6	cytoplasm	transporter
	ATP5PO	ATP synthase peripheral stalk subunit OSCP	cytoplasm	transporter
	ATP5S	distal membrane arm assembly complex 2 like	cytoplasm	transporter
	ATP5SL	distal membrane arm assembly complex 2	cytoplasm	other
	ATP6	ATP synthase F0 subunit 6	cytoplasm	transporter
	ATP6AP1	ATPase H+ transporting accessory protein 1	cytoplasm	transporter
	ATP6V0A1	ATPase H+ transporting V0 subunit a1	cytoplasm	transporter
	ATP6V0A2	ATPase H+ transporting V0 subunit a2	cytoplasm	transporter
	ATP6V0A4	ATPase H+ transporting V0 subunit a4	cytoplasm	transporter
	ATP6V0B	ATPase H+ transporting V0 subunit b	cytoplasm	transporter
	ATP6V0C	ATPase H+ transporting V0 subunit c	cytoplasm	transporter
	ATP6V0D1	ATPase H+ transporting V0 subunit d1	cytoplasm	transporter
	ATP6V0D2	ATPase H+ transporting V0 subunit d2	cytoplasm	transporter
	ATP6V0E1	ATPase H+ transporting V0 subunit e1	cytoplasm	transporter
	ATP6V0E2	ATPase H+ transporting V0 subunit e2	cytoplasm	enzyme
	ATP6V1A	ATPase H+ transporting V1 subunit A	plasma membrane	transporter
	ATP6V1B1	ATPase H+ transporting V1 subunit B1	cytoplasm	transporter
	ATP6V1B2	ATPase H+ transporting V1 subunit B2	cytoplasm	transporter
	ATP6V1C1	ATPase H+ transporting V1 subunit C1	cytoplasm	transporter
	ATP6V1C2	ATPase H+ transporting V1 subunit C2	cytoplasm	transporter
	ATP6V1D	ATPase H+ transporting V1 subunit D	cytoplasm	transporter
	ATP6V1E1	ATPase H+ transporting V1 subunit E1	cytoplasm	transporter
	ATP6V1E2	ATPase H+ transporting V1 subunit E2	cytoplasm	transporter
	ATP6V1F	ATPase H+ transporting V1 subunit F	cytoplasm	enzyme
	ATP6V1G1	ATPase H+ transporting V1 subunit G1	cytoplasm	transporter
	ATP6V1G2	ATPase H+ transporting V1 subunit G2	cytoplasm	transporter
	ATP6V1G3	ATPase H+ transporting V1 subunit G3	cytoplasm	transporter
	ATP6V1H	ATPase H+ transporting V1 subunit H	cytoplasm	transporter
	ATP7B	ATPase copper transporting beta	cytoplasm	transporter
	ATP8	ATP synthase F0 subunit 8	cytoplasm	enzyme
	ATPAF1	ATP synthase mitochondrial F1 complex assembly factor 1	cytoplasm	other
	ATPAF2	ATP synthase mitochondrial F1 complex assembly factor 2	cytoplasm	other
	ATPIF1	ATP synthase inhibitory factor subunit 1	cytoplasm	other
	ATRNL1	attractin like 1	other	other
	ATXN2	ataxin 2	nucleus	other
	AUH	AU RNA binding methylglutaconyl-CoA hydratase	cytoplasm	enzyme
	AURKAIP1	aurora kinase A interacting protein 1	nucleus	enzyme
	BAC
	BAD	BCL2 associated agonist of cell death	cytoplasm	other
	BAG2	BAG cochaperone 2	cytoplasm	other
	BAG5	BAG cochaperone 5	cytoplasm	other
	BAIAP3	BAI1 associated protein 3	extracellular space	other
	BAK1	BCL2 antagonist/killer 1	cytoplasm	other
	BAX	BCL2 associated X, apoptosis regulator	cytoplasm	transporter
	BBC3	BCL2 binding component 3	cytoplasm	other
	BBOX1	gamma-butyrobetaine hydroxylase 1	cytoplasm	enzyme
	BCAT1	branched chain amino acid transaminase 1	cytoplasm	enzyme
	BCAT2	branched chain amino acid transaminase 2	cytoplasm	enzyme
	BCKDHA	branched chain keto acid dehydrogenase E1 subunit alpha	cytoplasm	enzyme
	BCKDHB	branched chain keto acid dehydrogenase E1 subunit beta	cytoplasm	enzyme
	BCKDK	branched chain keto acid dehydrogenase kinase	cytoplasm	kinase
	BCL2	BCL2 apoptosis regulator	cytoplasm	transporter
	BCL2L1	BCL2 like 1	cytoplasm	other
	BCL2L13	BCL2 like 13	cytoplasm	other
	BCL2L2	BCL2 like 2	cytoplasm	other
	BCLAF3	BCLAF1 and THRAP3 family member 3	other	other
	BCL-XL
	BCO2	beta-carotene oxygenase 2	cytoplasm	enzyme
	BCS1L	BCS1 homolog, ubiquinol-cytochrome c reductase complex chaperone	cytoplasm	other
	BDH1	3-hydroxybutyrate dehydrogenase 1	cytoplasm	enzyme
	BDH2	3-hydroxybutyrate dehydrogenase 2	cytoplasm	enzyme
	BECLIN1
	BH3
	BID	BH3 interacting domain death agonist	cytoplasm	other
	BLID	BH3-like motif containing, cell death inducer	cytoplasm	other
	BLOC1S1	biogenesis of lysosomal organelles complex 1 subunit 1	cytoplasm	other
	BLOC1S2	biogenesis of lysosomal organelles complex 1 subunit 2	cytoplasm	other
	BLVRA	biliverdin reductase A	cytoplasm	enzyme
	BLVRB	biliverdin reductase B	cytoplasm	enzyme
	BNIP1	BCL2 interacting protein 1	cytoplasm	transporter
	BNIP3	BCL2 interacting protein 3	cytoplasm	other
	BNIP3L	BCL2 interacting protein 3 like	cytoplasm	other
	BOLA1	bolA family member 1	cytoplasm	other
	BOLA3	bolA family member 3	cytoplasm	other
	BPHL	biphenyl hydrolase like	cytoplasm	enzyme
	BPNT1	3'(2'), 5'-bisphosphate nucleotidase 1	nucleus	phosphatase
	BRI3BP	BRI3 binding protein	extracellular space	other
	BRINP3	BMP/retinoic acid inducible neural specific 3	cytoplasm	other
	BSG	basigin (Ok blood group)	plasma membrane	transporter
	BST1	bone marrow stromal cell antigen 1	plasma membrane	enzyme
	C10orf10	DEPP1 autophagy regulator	cytoplasm	other
	C10orf2	twinkle mtDNA helicase	cytoplasm	enzyme
	C12orf10	MYG1 exonuclease	nucleus	other
	C12orf65	chromosome 12 open reading frame 65	other	other
	C14orf119	chromosome 14 open reading frame 119	other	other
	C14orf159	D-glutamate cyclase	cytoplasm	enzyme
	C14orf2	ATP synthase membrane subunit 6.8PL	cytoplasm	other
	C15orf40	chromosome 15 open reading frame 40	other	other
	C15orf48	chromosome 15 open reading frame 48	nucleus	other
	C15orf61	chromosome 15 open reading frame 61	other	other
	C15orf62	chromosome 15 open reading frame 62	other	other
	C16orf91	chromosome 16 open reading frame 91	other	other
	C17orf62	cytochrome b-245 chaperone 1	cytoplasm	other
	C17orf89	NADH:ubiquinone oxidoreductase complex assembly factor 8	cytoplasm	other
	C19orf12	chromosome 19 open reading frame 12	cytoplasm	other
	C19orf52	translocase of inner mitochondrial membrane 29	cytoplasm	other
	C19orf70	mitochondrial contact site and cristae organizing system subunit 13	cytoplasm	other
	C1QBP	complement C1q binding protein	cytoplasm	transcription regulator
	C20orf194	chromosome 20 open reading frame 194	nucleus	other
	C20orf24	RAB5 interacting factor	cytoplasm	other
	C21orf33	glutamine amidotransferase like class 1 domain containing 3A	cytoplasm	other
	C2orf47	matrix AAA peptidase interacting protein 1	cytoplasm	other
	C2orf69	chromosome 2 open reading frame 69	other	other
	C3orf20	chromosome 3 open reading frame 20	cytoplasm	other
	C3orf33	chromosome 3 open reading frame 33	extracellular space	other
	C4orf14	nitric oxide associated 1	cytoplasm	other
	C5orf63	chromosome 5 open reading frame 63	cytoplasm	other
	C6orf136	chromosome 6 open reading frame 136	cytoplasm	other
	C6orf203	mitochondrial transcription rescue factor 1	cytoplasm	other
	C6orf57	succinate dehydrogenase complex assembly factor 4	cytoplasm	enzyme
	C7orf55	formation of mitochondrial complex V assembly factor 1 homolog	cytoplasm	other
	C8orf82	chromosome 8 open reading frame 82	cytoplasm	other
	CA5A	carbonic anhydrase 5A	cytoplasm	enzyme
	CA5B	carbonic anhydrase 5B	cytoplasm	enzyme
	CAD	carbamoyl-phosphate synthetase 2, aspartate transcarbamylase, and dihydroorotase	cytoplasm	enzyme
	CALR	calreticulin	cytoplasm	transcription regulator
	CALU	calumenin	cytoplasm	other
	CANT1	calcium activated nucleotidase 1	extracellular space	enzyme
	CANX	calnexin	cytoplasm	other
	CAPN10	calpain 10	cytoplasm	peptidase
	CAPRIN2	caprin family member 2	cytoplasm	other
	CARD19	caspase recruitment domain family member 19	cytoplasm	other
	CARKD	NAD(P)HX dehydratase	cytoplasm	enzyme
	CARS2	cysteinyl-tRNA synthetase 2, mitochondrial	cytoplasm	enzyme
	CAS9
	CASP8	caspase 8	nucleus	peptidase
	CAT	catalase	cytoplasm	enzyme
	CBR3	carbonyl reductase 3	cytoplasm	enzyme
	CBR4	carbonyl reductase 4	cytoplasm	enzyme
	CBWD2	COBW domain containing 2	other	other
	CCBL2	kynurenine aminotransferase 3	cytoplasm	enzyme
	CCDC109B	mitochondrial calcium uniporter dominant negative subunit beta	cytoplasm	other
	CCDC127	coiled-coil domain containing 127	other	other
	CCDC182	coiled-coil domain containing 182	other	other
	CCDC191	coiled-coil domain containing 191	other	other
	CCDC51	coiled-coil domain containing 51	cytoplasm	other
	CCDC58	coiled-coil domain containing 58	cytoplasm	other
	CCDC90B	coiled-coil domain containing 90B	cytoplasm	other
	CCS	copper chaperone for superoxide dismutase	cytoplasm	enzyme
	CCT6A	chaperonin containing TCP1 subunit 6A	cytoplasm	other
	CCT7	chaperonin containing TCP1 subunit 7	cytoplasm	other
	CD38	CD38 molecule	plasma membrane	enzyme
	CDA	cytidine deaminase	nucleus	enzyme
	CDC25C	cell division cycle 25C	nucleus	phosphatase
	CDIPT	CDP-diacylglycerol--inositol 3-phosphatidyltransferase	cytoplasm	enzyme
	CDK1	cyclin dependent kinase 1	nucleus	kinase
	CDK5RAP1	CDK5 regulatory subunit associated protein 1	extracellular space	enzyme
	CEBPZOS	CEBPZ opposite strand	other	other
	CECR5	haloacid dehalogenase like hydrolase domain containing 5	cytoplasm	other
	CEL	carboxyl ester lipase	extracellular space	enzyme
	CEND1	cell cycle exit and neuronal differentiation 1	other	other
	CEP89	centrosomal protein 89	cytoplasm	other
	CERK	ceramide kinase	plasma membrane	kinase
	CHAC1	ChaC glutathione specific gamma-glutamylcyclotransferase 1	cytoplasm	enzyme
	CHAC2	ChaC glutathione specific gamma-glutamylcyclotransferase 2	cytoplasm	enzyme
	CHCHD1	coiled-coil-helix-coiled-coil-helix domain containing 1	nucleus	other
	CHCHD10	coiled-coil-helix-coiled-coil-helix domain containing 10	cytoplasm	other
	CHCHD2	coiled-coil-helix-coiled-coil-helix domain containing 2	cytoplasm	other
	CHCHD3	coiled-coil-helix-coiled-coil-helix domain containing 3	cytoplasm	transcription regulator
	CHCHD4	coiled-coil-helix-coiled-coil-helix domain containing 4	cytoplasm	enzyme
	CHCHD5	coiled-coil-helix-coiled-coil-helix domain containing 5	other	other
	CHCHD6	coiled-coil-helix-coiled-coil-helix domain containing 6	cytoplasm	other
	CHCHD7	coiled-coil-helix-coiled-coil-helix domain containing 7	cytoplasm	other
	CHDH	choline dehydrogenase	cytoplasm	enzyme
	CHPT1	choline phosphotransferase 1	cytoplasm	enzyme
	CISD1	CDGSH iron sulfur domain 1	cytoplasm	other
	CISD2	CDGSH iron sulfur domain 2	cytoplasm	other
	CISD3	CDGSH iron sulfur domain 3	cytoplasm	other
	CKMT1A	creatine kinase, mitochondrial 1A	cytoplasm	kinase
	CKMT1B	creatine kinase, mitochondrial 1A	cytoplasm	kinase
	CKMT2	creatine kinase, mitochondrial 2	cytoplasm	kinase
	CLIC1	chloride intracellular channel 1	nucleus	ion channel
	CLIC4	chloride intracellular channel 4	plasma membrane	ion channel
	CLIC5	chloride intracellular channel 5	cytoplasm	ion channel
	CLPB	caseinolytic mitochondrial matrix peptidase chaperone subunit B	nucleus	transcription regulator
	CLPP	caseinolytic mitochondrial matrix peptidase proteolytic subunit	cytoplasm	peptidase
	CLPX	caseinolytic mitochondrial matrix peptidase chaperone subunit X	cytoplasm	enzyme
	CLTC	clathrin heavy chain	plasma membrane	other
	CLUH	clustered mitochondria homolog	cytoplasm	translation regulator
	CLYBL	citramalyl-CoA lyase	cytoplasm	enzyme
	CMC1	C-X9-C motif containing 1	cytoplasm	other
	CMC2	C-X9-C motif containing 2	cytoplasm	other
	CMC4	C-X9-C motif containing 4	cytoplasm	other
	CMPK1	cytidine/uridine monophosphate kinase 1	nucleus	kinase
	CMPK2	cytidine/uridine monophosphate kinase 2	cytoplasm	kinase
	CNKSR3	CNKSR family member 3	plasma membrane	kinase
	CNP	2',3'-cyclic nucleotide 3' phosphodiesterase	cytoplasm	enzyme
	CNPY2	canopy FGF signaling regulator 2	plasma membrane	other
	COA1	cytochrome c oxidase assembly factor 1 homolog	cytoplasm	other
	COA3	cytochrome c oxidase assembly factor 3	cytoplasm	other
	COA4	cytochrome c oxidase assembly factor 4 homolog	cytoplasm	other
	COA5	cytochrome c oxidase assembly factor 5	cytoplasm	other
	COA6	cytochrome c oxidase assembly factor 6	cytoplasm	other
	COA7	cytochrome c oxidase assembly factor 7 (putative)	cytoplasm	other
	COASY	Coenzyme A synthase	cytoplasm	kinase
	COMT	catechol-O-methyltransferase	cytoplasm	enzyme
	COMTD1	catechol-O-methyltransferase domain containing 1	plasma membrane	enzyme
	COQ10A	coenzyme Q10A	cytoplasm	other
	COQ10B	coenzyme Q10B	cytoplasm	other
	COQ2	coenzyme Q2, polyprenyltransferase	cytoplasm	enzyme
	COQ3	coenzyme Q3, methyltransferase	cytoplasm	enzyme
	COQ4	coenzyme Q4	cytoplasm	other
	COQ5	coenzyme Q5, methyltransferase	cytoplasm	enzyme
	COQ6	coenzyme Q6, monooxygenase	cytoplasm	enzyme
	COQ7	coenzyme Q7, hydroxylase	cytoplasm	enzyme
	COQ8A	coenzyme Q8A	cytoplasm	kinase
	COQ8B	coenzyme Q8B	cytoplasm	kinase
	COQ9	coenzyme Q9	cytoplasm	other
	COX1	cytochrome c oxidase subunit I	cytoplasm	enzyme
	COX10	cytochrome c oxidase assembly factor heme A:farnesyltransferase COX10	cytoplasm	enzyme
	COX11	cytochrome c oxidase copper chaperone COX11	cytoplasm	enzyme
	COX14	cytochrome c oxidase assembly factor COX14	cytoplasm	other
	COX15	cytochrome c oxidase assembly homolog COX15	cytoplasm	enzyme
	COX16	cytochrome c oxidase assembly factor COX16	cytoplasm	other
	COX17	cytochrome c oxidase copper chaperone COX17	cytoplasm	enzyme
	COX18	cytochrome c oxidase assembly factor COX18	cytoplasm	other
	COX19	cytochrome c oxidase assembly factor COX19	cytoplasm	other
	COX2	cytochrome c oxidase subunit II	cytoplasm	enzyme
	COX20	cytochrome c oxidase assembly factor COX20	cytoplasm	other
	COX3	cytochrome c oxidase III	cytoplasm	enzyme
	COX4I1	cytochrome c oxidase subunit 4I1	cytoplasm	enzyme
	COX4I2	cytochrome c oxidase subunit 4I2	cytoplasm	enzyme
	COX5A	cytochrome c oxidase subunit 5A	cytoplasm	enzyme
	COX5B	cytochrome c oxidase subunit 5B	cytoplasm	enzyme
	COX6A1	cytochrome c oxidase subunit 6A1	cytoplasm	enzyme
	COX6A2	cytochrome c oxidase subunit 6A2	cytoplasm	enzyme
	COX6B1	cytochrome c oxidase subunit 6B1	cytoplasm	enzyme
	COX6B2	cytochrome c oxidase subunit 6B2	cytoplasm	enzyme
	COX6C	cytochrome c oxidase subunit 6C	cytoplasm	enzyme
	COX7A1	cytochrome c oxidase subunit 7A1	cytoplasm	enzyme
	COX7A2	cytochrome c oxidase subunit 7A2	cytoplasm	enzyme
	COX7A2L	cytochrome c oxidase subunit 7A2 like	cytoplasm	enzyme
	COX7B	cytochrome c oxidase subunit 7B	cytoplasm	enzyme
	COX7B2	cytochrome c oxidase subunit 7B2	other	enzyme
	COX7C	cytochrome c oxidase subunit 7C	cytoplasm	enzyme
	COX8A	cytochrome c oxidase subunit 8A	cytoplasm	enzyme
	COX8C	cytochrome c oxidase subunit 8C	cytoplasm	enzyme
	CP	ceruloplasmin	extracellular space	enzyme
	CPOX	coproporphyrinogen oxidase	cytoplasm	enzyme
	CPS1	carbamoyl-phosphate synthase 1	cytoplasm	enzyme
	CPT1A	carnitine palmitoyltransferase 1A	cytoplasm	enzyme
	CPT1B	carnitine palmitoyltransferase 1B	cytoplasm	enzyme
	CPT1C	carnitine palmitoyltransferase 1C	cytoplasm	enzyme
	CPT2	carnitine palmitoyltransferase 2	cytoplasm	enzyme
	CRAT	carnitine O-acetyltransferase	cytoplasm	enzyme
	CREB
	CREB1	cAMP responsive element binding protein 1	nucleus	transcription regulator
	CRLS1	cardiolipin synthase 1	cytoplasm	enzyme
	CROT	carnitine O-octanoyltransferase	cytoplasm	enzyme
	CRY1	cryptochrome circadian regulator 1	nucleus	enzyme
	CRYAB	crystallin alpha B	nucleus	other
	CRYZ	crystallin zeta	cytoplasm	enzyme
	CS	citrate synthase	cytoplasm	enzyme
	CSE1L	chromosome segregation 1 like	nucleus	transporter
	CSKMT	citrate synthase lysine methyltransferase	cytoplasm	enzyme
	CTPS1	CTP synthase 1	nucleus	enzyme
	CTPS2	CTP synthase 2	cytoplasm	enzyme
	CTU1	cytosolic thiouridylase subunit 1	cytoplasm	other
	CTU2	cytosolic thiouridylase subunit 2	cytoplasm	other
	CUEDC1	CUE domain containing 1	other	other
	CUL2	cullin 2	nucleus	enzyme
	CUTA	cutA divalent cation tolerance homolog	cytoplasm	other
	CYB5A	cytochrome b5 type A	cytoplasm	enzyme
	CYB5B	cytochrome b5 type B	cytoplasm	enzyme
	CYB5R1	cytochrome b5 reductase 1	cytoplasm	enzyme
	CYB5R2	cytochrome b5 reductase 2	cytoplasm	enzyme
	CYB5R3	cytochrome b5 reductase 3	cytoplasm	enzyme
	CYC1	cytochrome c1	cytoplasm	enzyme
	CYCS	cytochrome c, somatic	cytoplasm	transporter
	CYP11A1	cytochrome P450 family 11 subfamily A member 1	cytoplasm	enzyme
	CYP11B1	cytochrome P450 family 11 subfamily B member 1	cytoplasm	enzyme
	CYP11B2	cytochrome P450 family 11 subfamily B member 2	cytoplasm	enzyme
	CYP17A1	cytochrome P450 family 17 subfamily A member 1	cytoplasm	enzyme
	CYP19A1	cytochrome P450 family 19 subfamily A member 1	cytoplasm	enzyme
	CYP1A1	cytochrome P450 family 1 subfamily A member 1	cytoplasm	enzyme
	CYP1A2	cytochrome P450 family 1 subfamily A member 2	cytoplasm	enzyme
	CYP1B1	cytochrome P450 family 1 subfamily B member 1	cytoplasm	enzyme
	CYP21A2	cytochrome P450 family 21 subfamily A member 2	cytoplasm	enzyme
	CYP24A1	cytochrome P450 family 24 subfamily A member 1	cytoplasm	enzyme
	CYP27A1	cytochrome P450 family 27 subfamily A member 1	cytoplasm	enzyme
	CYP27B1	cytochrome P450 family 27 subfamily B member 1	cytoplasm	enzyme
	CYP2E1	cytochrome P450 family 2 subfamily E member 1	cytoplasm	enzyme
	CYP2R1	cytochrome P450 family 2 subfamily R member 1	cytoplasm	enzyme
	CYP3A4	cytochrome P450 family 3 subfamily A member 4	cytoplasm	enzyme
	CYP3A5	cytochrome P450 family 3 subfamily A member 5	cytoplasm	enzyme
	CYP3A7	cytochrome P450 family 3 subfamily A member 7	cytoplasm	enzyme
	CYP3A7-CYP3A51P	CYP3A7-CYP3A51P readthrough	cytoplasm	enzyme
	CYP4A11	cytochrome P450 family 4 subfamily A member 11	cytoplasm	enzyme
	CYP4A22	cytochrome P450 family 4 subfamily A member 22	cytoplasm	enzyme
	CYP51A1	cytochrome P450 family 51 subfamily A member 1	cytoplasm	enzyme
	CYP7A1	cytochrome P450 family 7 subfamily A member 1	cytoplasm	enzyme
	CYP7B1	cytochrome P450 family 7 subfamily B member 1	cytoplasm	enzyme
	CYTB	cytochrome b	cytoplasm	enzyme
	D2HGDH	D-2-hydroxyglutarate dehydrogenase	cytoplasm	enzyme
	DACT2	dishevelled binding antagonist of beta catenin 2	cytoplasm	other
	DAOA	D-amino acid oxidase activator	cytoplasm	other
	DAP3	death associated protein 3	cytoplasm	other
	DARS2	aspartyl-tRNA synthetase 2, mitochondrial	cytoplasm	enzyme
	DBI	diazepam binding inhibitor, acyl-CoA binding protein	cytoplasm	other
	DBT	dihydrolipoamide branched chain transacylase E2	cytoplasm	enzyme
	DCAF5	DDB1 and CUL4 associated factor 5	cytoplasm	other
	DCAKD	dephospho-CoA kinase domain containing	cytoplasm	other
	DCK	deoxycytidine kinase	nucleus	kinase
	DCTD	dCMP deaminase	cytoplasm	enzyme
	DCTPP1	dCTP pyrophosphatase 1	cytoplasm	enzyme
	DCXR	dicarbonyl and L-xylulose reductase	cytoplasm	enzyme
	DDAH1	dimethylarginine dimethylaminohydrolase 1	cytoplasm	enzyme
	DDIT4	DNA damage inducible transcript 4	cytoplasm	other
	DDOST	dolichyl-diphosphooligosaccharide--protein glycosyltransferase non-catalytic subunit	cytoplasm	enzyme
	DDT	D-dopachrome tautomerase	cytoplasm	enzyme
	DDX28	DEAD-box helicase 28	nucleus	enzyme
	DDX3X	DEAD-box helicase 3 X-linked	cytoplasm	enzyme
	DECR1	2,4-dienoyl-CoA reductase 1	cytoplasm	enzyme
	DENND2D	DENN domain containing 2D	cytoplasm	other
	DEPP1	DEPP1 autophagy regulator	cytoplasm	other
	DEPTOR	DEP domain containing MTOR interacting protein	cytoplasm	other
	DGLUCY	D-glutamate cyclase	cytoplasm	enzyme
	DGUOK	deoxyguanosine kinase	cytoplasm	kinase
	DHCR24	24-dehydrocholesterol reductase	cytoplasm	enzyme
	DHCR7	7-dehydrocholesterol reductase	cytoplasm	enzyme
	DHFR2	dihydrofolate reductase 2	cytoplasm	enzyme
	DHODH	dihydroorotate dehydrogenase (quinone)	cytoplasm	enzyme
	DHRS1	dehydrogenase/reductase 1	cytoplasm	enzyme
	DHRS11	dehydrogenase/reductase 11	other	other
	DHRS2	dehydrogenase/reductase 2	nucleus	enzyme
	DHRS3	dehydrogenase/reductase 3	cytoplasm	enzyme
	DHRS4	dehydrogenase/reductase 4	cytoplasm	enzyme
	DHRS7	dehydrogenase/reductase 7	other	enzyme
	DHRS7B	dehydrogenase/reductase 7B	other	other
	DHRSX	dehydrogenase/reductase X-linked	extracellular space	enzyme
	DHTKD1	dehydrogenase E1 and transketolase domain containing 1	cytoplasm	enzyme
	DHX30	DExH-box helicase 30	nucleus	enzyme
	DHX32	DEAH-box helicase 32 (putative)	other	enzyme
	DIABLO	diablo IAP-binding mitochondrial protein	cytoplasm	other
	DISC1	DISC1 scaffold protein	cytoplasm	other
	DLAT	dihydrolipoamide S-acetyltransferase	cytoplasm	enzyme
	DLD	dihydrolipoamide dehydrogenase	cytoplasm	enzyme
	DLST	dihydrolipoamide S-succinyltransferase	cytoplasm	enzyme
	DMAC1	distal membrane arm assembly complex 1	cytoplasm	other
	DMAC2	distal membrane arm assembly complex 2	cytoplasm	other
	DMGDH	dimethylglycine dehydrogenase	cytoplasm	enzyme
	DMPK	DM1 protein kinase	cytoplasm	kinase
	DNA2	DNA replication helicase/nuclease 2	cytoplasm	enzyme
	DNAJA1	DnaJ heat shock protein family (Hsp40) member A1	nucleus	other
	DNAJA3	DnaJ heat shock protein family (Hsp40) member A3	cytoplasm	other
	DNAJC11	DnaJ heat shock protein family (Hsp40) member C11	cytoplasm	other
	DNAJC15	DnaJ heat shock protein family (Hsp40) member C15	cytoplasm	other
	DNAJC19	DnaJ heat shock protein family (Hsp40) member C19	cytoplasm	other
	DNAJC28	DnaJ heat shock protein family (Hsp40) member C28	other	other
	DNAJC30	DnaJ heat shock protein family (Hsp40) member C30	cytoplasm	other
	DNAJC4	DnaJ heat shock protein family (Hsp40) member C4	cytoplasm	other
	DNAJC5	DnaJ heat shock protein family (Hsp40) member C5	plasma membrane	other
	DNLZ	DNL-type zinc finger	cytoplasm	other
	DNM1L	dynamin 1 like	cytoplasm	enzyme
	DNM3	dynamin 3	cytoplasm	enzyme
	DNMT1	DNA methyltransferase 1	nucleus	enzyme
	DNMT3A	DNA methyltransferase 3 alpha	nucleus	enzyme
	DOCK8	dedicator of cytokinesis 8	cytoplasm	other
	DOK4	docking protein 4	plasma membrane	other
	DOK6	docking protein 6	cytoplasm	other
	DPYD	dihydropyrimidine dehydrogenase	cytoplasm	enzyme
	DPYS	dihydropyrimidinase	cytoplasm	enzyme
	DPYSL4	dihydropyrimidinase like 4	cytoplasm	enzyme
	DRP1
	DTNB	dystrobrevin beta	plasma membrane	other
	DTYMK	deoxythymidylate kinase	cytoplasm	kinase
	DUS2	dihydrouridine synthase 2	cytoplasm	enzyme
	DUSP18	dual specificity phosphatase 18	cytoplasm	phosphatase
	DUSP21	dual specificity phosphatase 21	cytoplasm	phosphatase
	DUSP26	dual specificity phosphatase 26	cytoplasm	enzyme
	DUT	deoxyuridine triphosphatase	nucleus	enzyme
	EARS2	glutamyl-tRNA synthetase 2, mitochondrial	cytoplasm	enzyme
	EBP	EBP cholestenol delta-isomerase	cytoplasm	enzyme
	ECH1	enoyl-CoA hydratase 1	cytoplasm	enzyme
	ECHDC1	ethylmalonyl-CoA decarboxylase 1	cytoplasm	enzyme
	ECHDC2	enoyl-CoA hydratase domain containing 2	other	other
	ECHDC3	enoyl-CoA hydratase domain containing 3	cytoplasm	enzyme
	ECHS1	enoyl-CoA hydratase, short chain 1	cytoplasm	enzyme
	ECI1	enoyl-CoA delta isomerase 1	cytoplasm	enzyme
	ECI2	enoyl-CoA delta isomerase 2	cytoplasm	enzyme
	ECSIT	ECSIT signaling integrator	nucleus	transcription regulator
	EEF1B2	eukaryotic translation elongation factor 1 beta 2	cytoplasm	translation regulator
	EEF1G	eukaryotic translation elongation factor 1 gamma	cytoplasm	translation regulator
	EEF2	eukaryotic translation elongation factor 2	cytoplasm	translation regulator
	EEFSEC	eukaryotic elongation factor, selenocysteine-tRNA specific	cytoplasm	translation regulator
	EFHD1	EF-hand domain family member D1	cytoplasm	other
	EHHADH	enoyl-CoA hydratase and 3-hydroxyacyl CoA dehydrogenase	cytoplasm	enzyme
	EIF4EBP2	eukaryotic translation initiation factor 4E binding protein 2	cytoplasm	translation regulator
	ELAC2	elaC ribonuclease Z 2	nucleus	enzyme
	ELOVL1	ELOVL fatty acid elongase 1	cytoplasm	enzyme
	ELOVL2	ELOVL fatty acid elongase 2	cytoplasm	enzyme
	ELOVL3	ELOVL fatty acid elongase 3	cytoplasm	enzyme
	ELOVL4	ELOVL fatty acid elongase 4	cytoplasm	enzyme
	ELOVL5	ELOVL fatty acid elongase 5	cytoplasm	enzyme
	ELOVL6	ELOVL fatty acid elongase 6	cytoplasm	enzyme
	ELOVL7	ELOVL fatty acid elongase 7	cytoplasm	enzyme
	EMC2	ER membrane protein complex subunit 2	nucleus	other
	EMC8	ER membrane protein complex subunit 8	cytoplasm	other
	ENDOG	endonuclease G	cytoplasm	enzyme
	ENO1	enolase 1	cytoplasm	enzyme
	ENOSF1	enolase superfamily member 1	other	enzyme
	ENPP1	ectonucleotide pyrophosphatase/phosphodiesterase 1	plasma membrane	enzyme
	ENPP3	ectonucleotide pyrophosphatase/phosphodiesterase 3	plasma membrane	enzyme
	ENTPD1	ectonucleoside triphosphate diphosphohydrolase 1	plasma membrane	enzyme
	ENTPD3	ectonucleoside triphosphate diphosphohydrolase 3	plasma membrane	enzyme
	ENTPD4	ectonucleoside triphosphate diphosphohydrolase 4	cytoplasm	enzyme
	ENTPD5	ectonucleoside triphosphate diphosphohydrolase 5 (inactive)	cytoplasm	enzyme
	ENTPD6	ectonucleoside triphosphate diphosphohydrolase 6	cytoplasm	enzyme
	ENTPD8	ectonucleoside triphosphate diphosphohydrolase 8	plasma membrane	enzyme
	EPDR1	ependymin related 1	nucleus	other
	EPHX2	epoxide hydrolase 2	cytoplasm	enzyme
	EPRS	glutamyl-prolyl-tRNA synthetase 1	cytoplasm	enzyme
	ERAL1	Era like 12S mitochondrial rRNA chaperone 1	cytoplasm	other
	ERCC6L2	ERCC excision repair 6 like 2	other	enzyme
	ERR	solute carrier family 7 member 1	plasma membrane	transporter
	ESR2	estrogen receptor 2	nucleus	ligand-dependent nuclear receptor
	ESYT1	extended synaptotagmin 1	cytoplasm	other
	ETF1	eukaryotic translation termination factor 1	cytoplasm	translation regulator
	ETFA	electron transfer flavoprotein subunit alpha	cytoplasm	transporter
	ETFB	electron transfer flavoprotein subunit beta	cytoplasm	transporter
	ETFBKMT	electron transfer flavoprotein subunit beta lysine methyltransferase	cytoplasm	enzyme
	ETFDH	electron transfer flavoprotein dehydrogenase	cytoplasm	enzyme
	ETFRF1	electron transfer flavoprotein regulatory factor 1	cytoplasm	other
	ETHE1	ETHE1 persulfide dioxygenase	cytoplasm	enzyme
	EVI5L	ecotropic viral integration site 5 like	other	other
	EXD2	exonuclease 3'-5' domain containing 2	cytoplasm	enzyme
	EXOG	exo/endonuclease G	cytoplasm	enzyme
	FAAH	fatty acid amide hydrolase	plasma membrane	enzyme
	FABP1	fatty acid binding protein 1	cytoplasm	transporter
	FACL
	FADS1	fatty acid desaturase 1	plasma membrane	enzyme
	FADS2	fatty acid desaturase 2	plasma membrane	enzyme
	FAHD1	fumarylacetoacetate hydrolase domain containing 1	cytoplasm	enzyme
	FAHD2A	fumarylacetoacetate hydrolase domain containing 2A	other	enzyme
	FAHD2B	fumarylacetoacetate hydrolase domain containing 2B	cytoplasm	other
	FAM136A	family with sequence similarity 136 member A	cytoplasm	other
	FAM162A	family with sequence similarity 162 member A	cytoplasm	other
	FAM171B	family with sequence similarity 171 member B	other	other
	FAM173A	adenine nucleotide translocase lysine methyltransferase	cytoplasm	enzyme
	FAM173B	ATP synthase c subunit lysine N-methyltransferase	cytoplasm	enzyme
	FAM185A	family with sequence similarity 185 member A	cytoplasm	other
	FAM189A1	family with sequence similarity 189 member A1	other	other
	FAM195A	MAPK regulated corepressor interacting protein 2	cytoplasm	other
	FAM210A	family with sequence similarity 210 member A	cytoplasm	other
	FAM210B	family with sequence similarity 210 member B	extracellular space	other
	FAM213A	peroxiredoxin like 2A	extracellular space	other
	FAM222A	family with sequence similarity 222 member A	other	other
	FAM92A	CBY1 interacting BAR domain containing 1	cytoplasm	other
	FANCG	FA complementation group G	nucleus	other
	FARS2	phenylalanyl-tRNA synthetase 2, mitochondrial	cytoplasm	enzyme
	FASN	fatty acid synthase	cytoplasm	enzyme
	FASTK	Fas activated serine/threonine kinase	cytoplasm	kinase
	FASTKD1	FAST kinase domains 1	cytoplasm	other
	FASTKD2	FAST kinase domains 2	cytoplasm	other
	FASTKD3	FAST kinase domains 3	cytoplasm	other
	FASTKD5	FAST kinase domains 5	cytoplasm	other
	FBXL12	F-box and leucine rich repeat protein 12	cytoplasm	other
	FBXL4	F-box and leucine rich repeat protein 4	nucleus	other
	FBXO17	F-box protein 17	cytoplasm	enzyme
	FDFT1	farnesyl-diphosphate farnesyltransferase 1	cytoplasm	enzyme
	FDPS	farnesyl diphosphate synthase	cytoplasm	enzyme
	FDX1	ferredoxin 1	cytoplasm	transporter
	FDX1L	ferredoxin 2	cytoplasm	transporter
	FDX2	ferredoxin 2	cytoplasm	transporter
	FDXR	ferredoxin reductase	cytoplasm	enzyme
	FECH	ferrochelatase	cytoplasm	enzyme
	FEN1	flap structure-specific endonuclease 1	nucleus	enzyme
	FGFR1OP2	FGFR1 oncogene partner 2	cytoplasm	other
	FH	fumarate hydratase	cytoplasm	enzyme
	FHIT	fragile histidine triad diadenosine triphosphatase	cytoplasm	enzyme
	FHL1	four and a half LIM domains 1	cytoplasm	other
	FIS1	fission, mitochondrial 1	cytoplasm	other
	FKBP10	FKBP prolyl isomerase 10	cytoplasm	enzyme
	FKBP11	FKBP prolyl isomerase 11	cytoplasm	enzyme
	FKBP12
	FKBP2	FKBP prolyl isomerase 2	cytoplasm	enzyme
	FKBP4	FKBP prolyl isomerase 4	nucleus	enzyme
	FKBP8	FKBP prolyl isomerase 8	cytoplasm	other
	FLAD1	flavin adenine dinucleotide synthetase 1	cytoplasm	enzyme
	FLVCR1	FLVCR heme transporter 1	plasma membrane	transporter
	FMC1	formation of mitochondrial complex V assembly factor 1 homolog	cytoplasm	other
	FOXRED1	FAD dependent oxidoreductase domain containing 1	cytoplasm	other
	FPGS	folylpolyglutamate synthase	cytoplasm	enzyme
	FRB
	FSIP2	fibrous sheath interacting protein 2	cytoplasm	other
	FTH1	ferritin heavy chain 1	cytoplasm	enzyme
	FTL	ferritin light chain	cytoplasm	enzyme
	FTMT	ferritin mitochondrial	cytoplasm	enzyme
	FTSJ2	mitochondrial rRNA methyltransferase 2	nucleus	enzyme
	FUNDC1	FUN14 domain containing 1	cytoplasm	other
	FUNDC2	FUN14 domain containing 2	cytoplasm	other
	FXN	frataxin	cytoplasm	kinase
	G0S2	G0/G1 switch 2	cytoplasm	other
	G6PD	glucose-6-phosphate dehydrogenase	cytoplasm	enzyme
	GADD45GIP1	GADD45G interacting protein 1	nucleus	other
	GALK2	galactokinase 2	cytoplasm	kinase
	GANAB	glucosidase II alpha subunit	cytoplasm	enzyme
	GAPDH	glyceraldehyde-3-phosphate dehydrogenase	cytoplasm	enzyme
	GARS	glycyl-tRNA synthetase 1	cytoplasm	enzyme
	GATB	glutamyl-tRNA amidotransferase subunit B	cytoplasm	enzyme
	GATC	glutamyl-tRNA amidotransferase subunit C	nucleus	enzyme
	GATM	glycine amidinotransferase	cytoplasm	enzyme
	GBAS	nipsnap homolog 2	plasma membrane	other
	GCAT	glycine C-acetyltransferase	cytoplasm	enzyme
	GCDH	glutaryl-CoA dehydrogenase	cytoplasm	enzyme
	GCLC	glutamate-cysteine ligase catalytic subunit	cytoplasm	enzyme
	GCLM	glutamate-cysteine ligase modifier subunit	cytoplasm	enzyme
	GCSH	glycine cleavage system protein H	cytoplasm	enzyme
	GDAP1	ganglioside induced differentiation associated protein 1	cytoplasm	other
	GDAP1L1	ganglioside induced differentiation associated protein 1 like 1	other	other
	GDF5OS	GDF5 antisense RNA 1	other	other
	GDPD1	glycerophosphodiester phosphodiesterase domain containing 1	cytoplasm	enzyme
	GFER	growth factor, augmenter of liver regeneration	nucleus	enzyme
	GFM1	G elongation factor mitochondrial 1	cytoplasm	translation regulator
	GFM2	GTP dependent ribosome recycling factor mitochondrial 2	cytoplasm	translation regulator
	GGCT	gamma-glutamylcyclotransferase	cytoplasm	enzyme
	GGCX	gamma-glutamyl carboxylase	cytoplasm	enzyme
	GGPS1	geranylgeranyl diphosphate synthase 1	cytoplasm	enzyme
	GGT1	gamma-glutamyltransferase 1	plasma membrane	enzyme
	GGT5	gamma-glutamyltransferase 5	plasma membrane	enzyme
	GGT6	gamma-glutamyltransferase 6	plasma membrane	peptidase
	GGT7	gamma-glutamyltransferase 7	plasma membrane	enzyme
	GHITM	growth hormone inducible transmembrane protein	cytoplasm	other
	GJA1	gap junction protein alpha 1	plasma membrane	transporter
	GK	glycerol kinase	cytoplasm	kinase
	GK2	glycerol kinase 2	cytoplasm	kinase
	GLDC	glycine decarboxylase	cytoplasm	enzyme
	GLO1	glyoxalase I	cytoplasm	enzyme
	GLOD4	glyoxalase domain containing 4	cytoplasm	enzyme
	GLOD5	glyoxalase domain containing 5	other	other
	GLRX2	glutaredoxin 2	cytoplasm	enzyme
	GLRX5	glutaredoxin 5	cytoplasm	other
	GLS	glutaminase	cytoplasm	enzyme
	GLS2	glutaminase 2	cytoplasm	enzyme
	GLUD1	glutamate dehydrogenase 1	cytoplasm	enzyme
	GLUD2	glutamate dehydrogenase 2	cytoplasm	enzyme
	GLUL	glutamate-ammonia ligase	cytoplasm	enzyme
	GLYAT	glycine-N-acyltransferase	cytoplasm	enzyme
	GLYCTK	glycerate kinase	cytoplasm	kinase
	GM2A	GM2 ganglioside activator	cytoplasm	enzyme
	GMFB	glia maturation factor beta	cytoplasm	growth factor
	GMPPB	GDP-mannose pyrophosphorylase B	cytoplasm	enzyme
	GMPR	guanosine monophosphate reductase	cytoplasm	enzyme
	GNB1	G protein subunit beta 1	plasma membrane	enzyme
	GNG5	G protein subunit gamma 5	plasma membrane	other
	GOLPH3	golgi phosphoprotein 3	cytoplasm	other
	GOT2	glutamic-oxaloacetic transaminase 2	cytoplasm	enzyme
	GPAM	glycerol-3-phosphate acyltransferase, mitochondrial	cytoplasm	enzyme
	GPAT2	glycerol-3-phosphate acyltransferase 2, mitochondrial	cytoplasm	enzyme
	GPD1	glycerol-3-phosphate dehydrogenase 1	cytoplasm	enzyme
	GPD2	glycerol-3-phosphate dehydrogenase 2	cytoplasm	enzyme
	GPI	glucose-6-phosphate isomerase	extracellular space	enzyme
	GPT2	glutamic--pyruvic transaminase 2	cytoplasm	enzyme
	GPX1	glutathione peroxidase 1	cytoplasm	enzyme
	GPX2	glutathione peroxidase 2	cytoplasm	enzyme
	GPX3	glutathione peroxidase 3	extracellular space	enzyme
	GPX4	glutathione peroxidase 4	cytoplasm	enzyme
	GPX5	glutathione peroxidase 5	extracellular space	enzyme
	GPX6	glutathione peroxidase 6	extracellular space	enzyme
	GPX7	glutathione peroxidase 7	cytoplasm	enzyme
	GPX8	glutathione peroxidase 8 (putative)	cytoplasm	enzyme
	GRAMD4	GRAM domain containing 4	cytoplasm	other
	GRHPR	glyoxylate and hydroxypyruvate reductase	cytoplasm	enzyme
	GRP75
	GRPEL1	GrpE like 1, mitochondrial	cytoplasm	other
	GRPEL2	GrpE like 2, mitochondrial	cytoplasm	other
	GRSF1	G-rich RNA sequence binding factor 1	cytoplasm	other
	GSE1	Gse1 coiled-coil protein	extracellular space	other
	GSR	glutathione-disulfide reductase	cytoplasm	enzyme
	GSS	glutathione synthetase	cytoplasm	enzyme
	GSTA1	glutathione S-transferase alpha 1	cytoplasm	enzyme
	GSTA2	glutathione S-transferase alpha 2	cytoplasm	enzyme
	GSTA3	glutathione S-transferase alpha 3	cytoplasm	enzyme
	GSTA4	glutathione S-transferase alpha 4	cytoplasm	enzyme
	GSTA5	glutathione S-transferase alpha 5	cytoplasm	enzyme
	GSTK1	glutathione S-transferase kappa 1	cytoplasm	enzyme
	GSTM1	glutathione S-transferase mu 1	cytoplasm	enzyme
	GSTM2	glutathione S-transferase mu 2	cytoplasm	enzyme
	GSTM3	glutathione S-transferase mu 3	cytoplasm	enzyme
	GSTM4	glutathione S-transferase mu 4	cytoplasm	enzyme
	GSTM5	glutathione S-transferase mu 5	cytoplasm	enzyme
	GSTO1	glutathione S-transferase omega 1	cytoplasm	enzyme
	GSTO2	glutathione S-transferase omega 2	cytoplasm	enzyme
	GSTP1	glutathione S-transferase pi 1	cytoplasm	enzyme
	GSTT1	glutathione S-transferase theta 1	cytoplasm	enzyme
	GSTT2	glutathione S-transferase theta 2 (gene/pseudogene)	cytoplasm	enzyme
	GSTT2B	glutathione S-transferase theta 2 (gene/pseudogene)	cytoplasm	enzyme
	GSTZ1	glutathione S-transferase zeta 1	cytoplasm	enzyme
	GTPBP10	GTP binding protein 10	cytoplasm	other
	GTPBP3	GTP binding protein 3, mitochondrial	cytoplasm	enzyme
	GTPBP6	GTP binding protein 6 (putative)	other	other
	GTPBP8	GTP binding protein 8 (putative)	cytoplasm	other
	GUF1	GUF1 homolog, GTPase	cytoplasm	other
	GUK1	guanylate kinase 1	cytoplasm	kinase
	GUSB	glucuronidase beta	cytoplasm	enzyme
	HACD1	3-hydroxyacyl-CoA dehydratase 1	cytoplasm	enzyme
	HACD2	3-hydroxyacyl-CoA dehydratase 2	cytoplasm	phosphatase
	HACD3	3-hydroxyacyl-CoA dehydratase 3	cytoplasm	enzyme
	HACD4	3-hydroxyacyl-CoA dehydratase 4	cytoplasm	enzyme
	HADH	hydroxyacyl-CoA dehydrogenase	cytoplasm	enzyme
	HADHA	hydroxyacyl-CoA dehydrogenase trifunctional multienzyme complex subunit alpha	cytoplasm	enzyme
	HADHB	hydroxyacyl-CoA dehydrogenase trifunctional multienzyme complex subunit beta	cytoplasm	enzyme
	HAGH	hydroxyacylglutathione hydrolase	cytoplasm	enzyme
	HAO2	hydroxyacid oxidase 2	cytoplasm	enzyme
	HARS2	histidyl-tRNA synthetase 2, mitochondrial	cytoplasm	enzyme
	HAX1	HCLS1 associated protein X-1	cytoplasm	other
	HCCS	holocytochrome c synthase	cytoplasm	enzyme
	HDDC2	HD domain containing 2	cytoplasm	other
	HDHD3	haloacid dehalogenase like hydrolase domain containing 3	cytoplasm	enzyme
	HDHD5	haloacid dehalogenase like hydrolase domain containing 5	cytoplasm	other
	HEATR1	HEAT repeat containing 1	nucleus	other
	HEATR6	HEAT repeat containing 6	other	other
	HEBP1	heme binding protein 1	cytoplasm	other
	HELZ2	helicase with zinc finger 2	nucleus	transcription regulator
	HEMK1	HemK methyltransferase family member 1	nucleus	enzyme
	HEPH	hephaestin	plasma membrane	transporter
	HIBADH	3-hydroxyisobutyrate dehydrogenase	cytoplasm	enzyme
	HIBCH	3-hydroxyisobutyryl-CoA hydrolase	cytoplasm	enzyme
	HIGD1A	HIG1 hypoxia inducible domain family member 1A	cytoplasm	other
	HIGD2A	HIG1 hypoxia inducible domain family member 2A	cytoplasm	other
	HINT1	histidine triad nucleotide binding protein 1	nucleus	enzyme
	HINT2	histidine triad nucleotide binding protein 2	cytoplasm	other
	HINT3	histidine triad nucleotide binding protein 3	cytoplasm	enzyme
	HK1	hexokinase 1	cytoplasm	kinase
	HK2	hexokinase 2	cytoplasm	kinase
	HK3	hexokinase 3	cytoplasm	kinase
	HKDC1	hexokinase domain containing 1	cytoplasm	kinase
	HMBS	hydroxymethylbilane synthase	cytoplasm	enzyme
	HMGCL	3-hydroxy-3-methylglutaryl-CoA lyase	cytoplasm	enzyme
	HMGCLL1	3-hydroxymethyl-3-methylglutaryl-CoA lyase like 1	cytoplasm	enzyme
	HMGCS1	3-hydroxy-3-methylglutaryl-CoA synthase 1	cytoplasm	enzyme
	HMGCS2	3-hydroxy-3-methylglutaryl-CoA synthase 2	cytoplasm	enzyme
	HMOX1	heme oxygenase 1	cytoplasm	enzyme
	HMOX2	heme oxygenase 2	cytoplasm	enzyme
	HNRNPK	heterogeneous nuclear ribonucleoprotein K	nucleus	transcription regulator
	HOGA1	4-hydroxy-2-oxoglutarate aldolase 1	cytoplasm	enzyme
	HPD	4-hydroxyphenylpyruvate dioxygenase	cytoplasm	enzyme
	HPDL	4-hydroxyphenylpyruvate dioxygenase like	other	other
	HPGDS	hematopoietic prostaglandin D synthase	cytoplasm	enzyme
	HRK	harakiri, BCL2 interacting protein	cytoplasm	other
	HRSP12	reactive intermediate imine deaminase A homolog	cytoplasm	enzyme
	HSCB	HscB mitochondrial iron-sulfur cluster cochaperone	cytoplasm	other
	HSD11B1	hydroxysteroid 11-beta dehydrogenase 1	cytoplasm	enzyme
	HSD11B2	hydroxysteroid 11-beta dehydrogenase 2	cytoplasm	enzyme
	HSD17B1	hydroxysteroid 17-beta dehydrogenase 1	cytoplasm	enzyme
	HSD17B10	hydroxysteroid 17-beta dehydrogenase 10	cytoplasm	enzyme
	HSD17B12	hydroxysteroid 17-beta dehydrogenase 12	cytoplasm	enzyme
	HSD17B2	hydroxysteroid 17-beta dehydrogenase 2	cytoplasm	enzyme
	HSD17B3	hydroxysteroid 17-beta dehydrogenase 3	cytoplasm	enzyme
	HSD17B4	hydroxysteroid 17-beta dehydrogenase 4	cytoplasm	enzyme
	HSD17B6	hydroxysteroid 17-beta dehydrogenase 6	other	enzyme
	HSD17B7	hydroxysteroid 17-beta dehydrogenase 7	cytoplasm	enzyme
	HSD17B8	hydroxysteroid 17-beta dehydrogenase 8	cytoplasm	enzyme
	HSD3B1	hydroxy-delta-5-steroid dehydrogenase, 3 beta- and steroid delta-isomerase 1	cytoplasm	enzyme
	HSD3B2	hydroxy-delta-5-steroid dehydrogenase, 3 beta- and steroid delta-isomerase 2	cytoplasm	enzyme
	HSDL1	hydroxysteroid dehydrogenase like 1	cytoplasm	enzyme
	HSDL2	hydroxysteroid dehydrogenase like 2	cytoplasm	transporter
	HSP90AA1	heat shock protein 90 alpha family class A member 1	cytoplasm	enzyme
	HSP90AB1	heat shock protein 90 alpha family class B member 1	cytoplasm	enzyme
	HSP90B1	heat shock protein 90 beta family member 1	cytoplasm	other
	HSPA1A	heat shock protein family A (Hsp70) member 1A	cytoplasm	enzyme
	HSPA5	heat shock protein family A (Hsp70) member 5	cytoplasm	enzyme
	HSPA8	heat shock protein family A (Hsp70) member 8	cytoplasm	enzyme
	HSPA9	heat shock protein family A (Hsp70) member 9	cytoplasm	other
	HSPB1	heat shock protein family B (small) member 1	cytoplasm	other
	HSPB7	heat shock protein family B (small) member 7	cytoplasm	other
	HSPD1	heat shock protein family D (Hsp60) member 1	cytoplasm	enzyme
	HSPE1	heat shock protein family E (Hsp10) member 1	cytoplasm	enzyme
	HSUV3
	HTATIP2	HIV-1 Tat interactive protein 2	nucleus	transcription regulator
	HTD2	hydroxyacyl-thioester dehydratase type 2	cytoplasm	enzyme
	HTRA2	HtrA serine peptidase 2	cytoplasm	peptidase
	HYOU1	hypoxia up-regulated 1	cytoplasm	other
	IAP
	IARS2	isoleucyl-tRNA synthetase 2, mitochondrial	cytoplasm	enzyme
	IBA57	iron-sulfur cluster assembly factor IBA57	cytoplasm	other
	ICA1L	islet cell autoantigen 1 like	cytoplasm	other
	ICT1	mitochondrial ribosomal protein L58	cytoplasm	enzyme
	IDE	insulin degrading enzyme	extracellular space	peptidase
	IDH1	isocitrate dehydrogenase (NADP(+)) 1	cytoplasm	enzyme
	IDH2	isocitrate dehydrogenase (NADP(+)) 2	cytoplasm	enzyme
	IDH3A	isocitrate dehydrogenase (NAD(+)) 3 catalytic subunit alpha	cytoplasm	enzyme
	IDH3B	isocitrate dehydrogenase (NAD(+)) 3 non-catalytic subunit beta	cytoplasm	enzyme
	IDH3G	isocitrate dehydrogenase (NAD(+)) 3 non-catalytic subunit gamma	cytoplasm	enzyme
	IDI1	isopentenyl-diphosphate delta isomerase 1	cytoplasm	enzyme
	IDNK	IDNK gluconokinase	cytoplasm	other
	IER5L	immediate early response 5 like	other	other
	IFI27	interferon alpha inducible protein 27	cytoplasm	other
	IFI6	interferon alpha inducible protein 6	cytoplasm	other
	IFIT3	interferon induced protein with tetratricopeptide repeats 3	cytoplasm	other
	IL4I1	interleukin 4 induced 1	cytoplasm	enzyme
	ILVBL	ilvB acetolactate synthase like	cytoplasm	enzyme
	IMMP1L	inner mitochondrial membrane peptidase subunit 1	cytoplasm	other
	IMMP2L	inner mitochondrial membrane peptidase subunit 2	cytoplasm	peptidase
	IMMT	inner membrane mitochondrial protein	cytoplasm	other
	IMPA2	inositol monophosphatase 2	cytoplasm	phosphatase
	ISCA1	iron-sulfur cluster assembly 1	cytoplasm	other
	ISCA2	iron-sulfur cluster assembly 2	cytoplasm	other
	ISCU	iron-sulfur cluster assembly enzyme	cytoplasm	other
	ISOC2	isochorismatase domain containing 2	cytoplasm	enzyme
	ITGA3	integrin subunit alpha 3	plasma membrane	other
	IVD	isovaleryl-CoA dehydrogenase	cytoplasm	enzyme
	KARS	lysyl-tRNA synthetase 1	cytoplasm	enzyme
	KCNJ1	potassium inwardly rectifying channel subfamily J member 1	plasma membrane	ion channel
	KCNJ11	potassium inwardly rectifying channel subfamily J member 11	plasma membrane	ion channel
	KCNMA1	potassium calcium-activated channel subfamily M alpha 1	plasma membrane	ion channel
	KIAA0100	KIAA0100	extracellular space	other
	KIAA0141	DAP3 binding cell death enhancer 1	cytoplasm	other
	KIAA0391	protein only RNase P catalytic subunit	cytoplasm	enzyme
	KIAA0930	KIAA0930	other	other
	KIAA1191	KIAA1191	cytoplasm	other
	KIAA1211L	CRACD like	other	other
	KIAA2013	KIAA2013	other	other
	KIF1B	kinesin family member 1B	cytoplasm	transporter
	KLHDC9	kelch domain containing 9	other	other
	KLHL29	kelch like family member 29	other	other
	KLK6	kallikrein related peptidase 6	extracellular space	peptidase
	KMO	kynurenine 3-monooxygenase	cytoplasm	enzyme
	KRT5	keratin 5	cytoplasm	other
	KYAT1	kynurenine aminotransferase 1	cytoplasm	enzyme
	KYAT3	kynurenine aminotransferase 3	cytoplasm	enzyme
	L2HGDH	L-2-hydroxyglutarate dehydrogenase	cytoplasm	enzyme
	LACE1	AFG1 like ATPase	cytoplasm	other
	LACTB	lactamase beta	cytoplasm	peptidase
	LACTB2	lactamase beta 2	cytoplasm	enzyme
	LAMC1	laminin subunit gamma 1	extracellular space	other
	LAMTOR3	late endosomal/lysosomal adaptor, MAPK and MTOR activator 3	cytoplasm	other
	LAP3	leucine aminopeptidase 3	cytoplasm	peptidase
	LARS2	leucyl-tRNA synthetase 2, mitochondrial	cytoplasm	enzyme
	LDHA	lactate dehydrogenase A	cytoplasm	enzyme
	LDHAL6A	lactate dehydrogenase A like 6A	cytoplasm	enzyme
	LDHAL6B	lactate dehydrogenase A like 6B	cytoplasm	enzyme
	LDHB	lactate dehydrogenase B	cytoplasm	enzyme
	LDHC	lactate dehydrogenase C	cytoplasm	enzyme
	LDHD	lactate dehydrogenase D	cytoplasm	enzyme
	LETM1	leucine zipper and EF-hand containing transmembrane protein 1	cytoplasm	transporter
	LETM2	leucine zipper and EF-hand containing transmembrane protein 2	other	other
	LETMD1	LETM1 domain containing 1	plasma membrane	other
	LEXM	lymphocyte expansion molecule	cytoplasm	other
	LHPP	phospholysine phosphohistidine inorganic pyrophosphate phosphatase	cytoplasm	phosphatase
	LIAS	lipoic acid synthetase	cytoplasm	enzyme
	LIG3	DNA ligase 3	nucleus	enzyme
	LIPA	lipase A, lysosomal acid type	cytoplasm	enzyme
	LIPT1	lipoyltransferase 1	cytoplasm	enzyme
	LIPT2	lipoyl(octanoyl) transferase 2	cytoplasm	enzyme
	LMAN1	lectin, mannose binding 1	cytoplasm	other
	LONP1	lon peptidase 1, mitochondrial	cytoplasm	peptidase
	LONP2	lon peptidase 2, peroxisomal	cytoplasm	peptidase
	LRPPRC	leucine rich pentatricopeptide repeat containing	cytoplasm	other
	LRRC10	leucine rich repeat containing 10	nucleus	other
	LRRC24	leucine rich repeat containing 24	other	other
	LRRC28	leucine rich repeat containing 28	other	other
	LRRC59	leucine rich repeat containing 59	cytoplasm	other
	LRRK1	leucine rich repeat kinase 1	cytoplasm	kinase
	LRRK2	leucine rich repeat kinase 2	cytoplasm	kinase
	LRTOMT	leucine rich transmembrane and O-methyltransferase domain containing	plasma membrane	enzyme
	LSS	lanosterol synthase	cytoplasm	enzyme
	LYPLA1	lysophospholipase 1	cytoplasm	enzyme
	LYPLAL1	lysophospholipase like 1	cytoplasm	enzyme
	LYRM1	LYR motif containing 1	cytoplasm	other
	LYRM2	LYR motif containing 2	cytoplasm	other
	LYRM4	LYR motif containing 4	cytoplasm	other
	LYRM5	electron transfer flavoprotein regulatory factor 1	cytoplasm	other
	LYRM7	LYR motif containing 7	cytoplasm	other
	LYRM9	LYR motif containing 9	other	other
	LYSMD2	LysM domain containing 2	other	other
	M1AP	meiosis 1 associated protein	cytoplasm	other
	MAATS1	cilia and flagella associated protein 91	cytoplasm	other
	MACROD1	mono-ADP ribosylhydrolase 1	cytoplasm	enzyme
	MAIP1	matrix AAA peptidase interacting protein 1	cytoplasm	other
	MALSU1	mitochondrial assembly of ribosomal large subunit 1	extracellular space	other
	MAOA	monoamine oxidase A	cytoplasm	enzyme
	MAOB	monoamine oxidase B	cytoplasm	enzyme
	MAPK1	mitogen-activated protein kinase 1	cytoplasm	kinase
	MAPK11	mitogen-activated protein kinase 11	cytoplasm	kinase
	MAPK12	mitogen-activated protein kinase 12	cytoplasm	kinase
	MAPK3	mitogen-activated protein kinase 3	cytoplasm	kinase
	MARC1	mitochondrial amidoxime reducing component 1	cytoplasm	enzyme
	MARC2	mitochondrial amidoxime reducing component 2	cytoplasm	enzyme
	MARCH5	membrane associated ring-CH-type finger 5	cytoplasm	enzyme
	MARS2	methionyl-tRNA synthetase 2, mitochondrial	cytoplasm	enzyme
	MAVS	mitochondrial antiviral signaling protein	cytoplasm	other
	MCAT	malonyl-CoA-acyl carrier protein transacylase	cytoplasm	enzyme
	MCCC1	methylcrotonoyl-CoA carboxylase 1	cytoplasm	enzyme
	MCCC2	methylcrotonoyl-CoA carboxylase 2	cytoplasm	enzyme
	MCCD1	mitochondrial coiled-coil domain 1	other	other
	MCEE	methylmalonyl-CoA epimerase	cytoplasm	enzyme
	MCL1	MCL1 apoptosis regulator, BCL2 family member	cytoplasm	transporter
	MCU	mitochondrial calcium uniporter	cytoplasm	ion channel
	MCUB	mitochondrial calcium uniporter dominant negative subunit beta	cytoplasm	other
	MCUR1	mitochondrial calcium uniporter regulator 1	cytoplasm	other
	MDH1	malate dehydrogenase 1	cytoplasm	enzyme
	MDH2	malate dehydrogenase 2	cytoplasm	enzyme
	MDM10
	MDM34
	ME1	malic enzyme 1	cytoplasm	enzyme
	ME2	malic enzyme 2	cytoplasm	enzyme
	ME3	malic enzyme 3	cytoplasm	enzyme
	MECR	mitochondrial trans-2-enoyl-CoA reductase	cytoplasm	enzyme
	METAP1D	methionyl aminopeptidase type 1D, mitochondrial	cytoplasm	peptidase
	METTL15	methyltransferase like 15	other	other
	METTL17	methyltransferase like 17	nucleus	other
	METTL5	methyltransferase like 5	other	enzyme
	METTL8	methyltransferase like 8	other	enzyme
	METTL9	methyltransferase like 9	other	other
	MFF	mitochondrial fission factor	cytoplasm	other
	MFN1	mitofusin 1	cytoplasm	enzyme
	MFN2	mitofusin 2	cytoplasm	enzyme
	MGARP	mitochondria localized glutamic acid rich protein	cytoplasm	other
	MGME1	mitochondrial genome maintenance exonuclease 1	cytoplasm	enzyme
	MGST1	microsomal glutathione S-transferase 1	cytoplasm	enzyme
	MGST2	microsomal glutathione S-transferase 2	cytoplasm	enzyme
	MGST3	microsomal glutathione S-transferase 3	cytoplasm	enzyme
	MICU1	mitochondrial calcium uptake 1	cytoplasm	other
	MICU2	mitochondrial calcium uptake 2	cytoplasm	other
	MICU3	mitochondrial calcium uptake family member 3	cytoplasm	other
	MIEF1	mitochondrial elongation factor 1	cytoplasm	other
	MIEF2	mitochondrial elongation factor 2	cytoplasm	other
	MIG1
	MIGA1	mitoguardin 1	plasma membrane	other
	MIGA2	mitoguardin 2	plasma membrane	other
	MILTON
	MINOS1	mitochondrial contact site and cristae organizing system subunit 10	cytoplasm	other
	MIPEP	mitochondrial intermediate peptidase	cytoplasm	peptidase
	MIRO
	MLEC	malectin	plasma membrane	other
	MLH1	mutL homolog 1	nucleus	enzyme
	MLX	MAX dimerization protein MLX	nucleus	transcription regulator
	MLXIP	MLX interacting protein	nucleus	transcription regulator
	MLYCD	malonyl-CoA decarboxylase	cytoplasm	enzyme
	MMAA	metabolism of cobalamin associated A	cytoplasm	enzyme
	MMAB	metabolism of cobalamin associated B	cytoplasm	enzyme
	MMACHC	metabolism of cobalamin associated C	cytoplasm	enzyme
	MMADHC	metabolism of cobalamin associated D	cytoplasm	other
	MMM1
	MMM12
	MMR1
	MMUT	methylmalonyl-CoA mutase	cytoplasm	enzyme
	MOBP	myelin associated oligodendrocyte basic protein	cytoplasm	other
	MOCS1	molybdenum cofactor synthesis 1	cytoplasm	other
	MOGS	mannosyl-oligosaccharide glucosidase	cytoplasm	enzyme
	MORN1	MORN repeat containing 1	other	other
	MPC1	mitochondrial pyruvate carrier 1	cytoplasm	other
	MPC1L	mitochondrial pyruvate carrier 1 like	other	other
	MPC2	mitochondrial pyruvate carrier 2	plasma membrane	other
	MPG	N-methylpurine DNA glycosylase	nucleus	enzyme
	MPST	mercaptopyruvate sulfurtransferase	cytoplasm	enzyme
	MPV17	mitochondrial inner membrane protein MPV17	cytoplasm	ion channel
	MPV17L	MPV17 mitochondrial inner membrane protein like	cytoplasm	other
	MPV17L2	MPV17 mitochondrial inner membrane protein like 2	cytoplasm	other
	MRM1	mitochondrial rRNA methyltransferase 1	cytoplasm	enzyme
	MRM2	mitochondrial rRNA methyltransferase 2	nucleus	enzyme
	MRM3	mitochondrial rRNA methyltransferase 3	cytoplasm	enzyme
	MRP
	MRPL1	mitochondrial ribosomal protein L1	cytoplasm	other
	MRPL10	mitochondrial ribosomal protein L10	cytoplasm	other
	MRPL11	mitochondrial ribosomal protein L11	cytoplasm	other
	MRPL12	mitochondrial ribosomal protein L12	cytoplasm	other
	MRPL13	mitochondrial ribosomal protein L13	cytoplasm	other
	MRPL14	mitochondrial ribosomal protein L14	cytoplasm	other
	MRPL15	mitochondrial ribosomal protein L15	cytoplasm	other
	MRPL16	mitochondrial ribosomal protein L16	cytoplasm	other
	MRPL17	mitochondrial ribosomal protein L17	cytoplasm	other
	MRPL18	mitochondrial ribosomal protein L18	cytoplasm	translation regulator
	MRPL19	mitochondrial ribosomal protein L19	cytoplasm	other
	MRPL2	mitochondrial ribosomal protein L2	extracellular space	other
	MRPL20	mitochondrial ribosomal protein L20	cytoplasm	other
	MRPL21	mitochondrial ribosomal protein L21	cytoplasm	other
	MRPL22	mitochondrial ribosomal protein L22	cytoplasm	other
	MRPL23	mitochondrial ribosomal protein L23	cytoplasm	other
	MRPL24	mitochondrial ribosomal protein L24	cytoplasm	other
	MRPL27	mitochondrial ribosomal protein L27	cytoplasm	other
	MRPL28	mitochondrial ribosomal protein L28	cytoplasm	other
	MRPL3	mitochondrial ribosomal protein L3	cytoplasm	other
	MRPL30	mitochondrial ribosomal protein L30	cytoplasm	other
	MRPL32	mitochondrial ribosomal protein L32	cytoplasm	translation regulator
	MRPL33	mitochondrial ribosomal protein L33	cytoplasm	other
	MRPL34	mitochondrial ribosomal protein L34	cytoplasm	other
	MRPL35	mitochondrial ribosomal protein L35	cytoplasm	other
	MRPL36	mitochondrial ribosomal protein L36	cytoplasm	other
	MRPL37	mitochondrial ribosomal protein L37	cytoplasm	enzyme
	MRPL38	mitochondrial ribosomal protein L38	cytoplasm	other
	MRPL39	mitochondrial ribosomal protein L39	cytoplasm	other
	MRPL4	mitochondrial ribosomal protein L4	cytoplasm	other
	MRPL40	mitochondrial ribosomal protein L40	cytoplasm	other
	MRPL41	mitochondrial ribosomal protein L41	cytoplasm	other
	MRPL42	mitochondrial ribosomal protein L42	cytoplasm	other
	MRPL43	mitochondrial ribosomal protein L43	cytoplasm	translation regulator
	MRPL44	mitochondrial ribosomal protein L44	cytoplasm	enzyme
	MRPL45	mitochondrial ribosomal protein L45	cytoplasm	other
	MRPL46	mitochondrial ribosomal protein L46	cytoplasm	other
	MRPL47	mitochondrial ribosomal protein L47	cytoplasm	other
	MRPL48	mitochondrial ribosomal protein L48	cytoplasm	other
	MRPL49	mitochondrial ribosomal protein L49	cytoplasm	enzyme
	MRPL50	mitochondrial ribosomal protein L50	cytoplasm	other
	MRPL51	mitochondrial ribosomal protein L51	cytoplasm	other
	MRPL52	mitochondrial ribosomal protein L52	cytoplasm	other
	MRPL53	mitochondrial ribosomal protein L53	cytoplasm	other
	MRPL54	mitochondrial ribosomal protein L54	cytoplasm	other
	MRPL55	mitochondrial ribosomal protein L55	cytoplasm	other
	MRPL57	mitochondrial ribosomal protein L57	cytoplasm	other
	MRPL58	mitochondrial ribosomal protein L58	cytoplasm	enzyme
	MRPL9	mitochondrial ribosomal protein L9	cytoplasm	translation regulator
	MRPP1
	MRPP1-3
	MRPS10	mitochondrial ribosomal protein S10	cytoplasm	other
	MRPS11	mitochondrial ribosomal protein S11	cytoplasm	other
	MRPS12	mitochondrial ribosomal protein S12	cytoplasm	other
	MRPS14	mitochondrial ribosomal protein S14	cytoplasm	other
	MRPS15	mitochondrial ribosomal protein S15	cytoplasm	other
	MRPS16	mitochondrial ribosomal protein S16	cytoplasm	other
	MRPS17	mitochondrial ribosomal protein S17	cytoplasm	other
	MRPS18A	mitochondrial ribosomal protein S18A	cytoplasm	other
	MRPS18B	mitochondrial ribosomal protein S18B	cytoplasm	other
	MRPS18C	mitochondrial ribosomal protein S18C	cytoplasm	other
	MRPS2	mitochondrial ribosomal protein S2	cytoplasm	other
	MRPS21	mitochondrial ribosomal protein S21	cytoplasm	other
	MRPS22	mitochondrial ribosomal protein S22	cytoplasm	other
	MRPS23	mitochondrial ribosomal protein S23	cytoplasm	other
	MRPS24	mitochondrial ribosomal protein S24	cytoplasm	other
	MRPS25	mitochondrial ribosomal protein S25	cytoplasm	other
	MRPS26	mitochondrial ribosomal protein S26	cytoplasm	other
	MRPS27	mitochondrial ribosomal protein S27	cytoplasm	other
	MRPS28	mitochondrial ribosomal protein S28	cytoplasm	other
	MRPS30	mitochondrial ribosomal protein S30	cytoplasm	enzyme
	MRPS31	mitochondrial ribosomal protein S31	cytoplasm	other
	MRPS33	mitochondrial ribosomal protein S33	cytoplasm	other
	MRPS34	mitochondrial ribosomal protein S34	cytoplasm	other
	MRPS35	mitochondrial ribosomal protein S35	cytoplasm	other
	MRPS36	mitochondrial ribosomal protein S36	cytoplasm	other
	MRPS5	mitochondrial ribosomal protein S5	cytoplasm	other
	MRPS6	mitochondrial ribosomal protein S6	cytoplasm	other
	MRPS7	mitochondrial ribosomal protein S7	cytoplasm	other
	MRPS9	mitochondrial ribosomal protein S9	cytoplasm	other
	MRRF	mitochondrial ribosome recycling factor	cytoplasm	other
	MRS2	magnesium transporter MRS2	cytoplasm	transporter
	MSMO1	methylsterol monooxygenase 1	cytoplasm	enzyme
	MSRA	methionine sulfoxide reductase A	cytoplasm	enzyme
	MSRB2	methionine sulfoxide reductase B2	cytoplasm	enzyme
	MSRB3	methionine sulfoxide reductase B3	cytoplasm	enzyme
	MSTO1	misato mitochondrial distribution and morphology regulator 1	cytoplasm	other
	MT-ATP6	ATP synthase F0 subunit 6	cytoplasm	transporter
	MT-ATP8	ATP synthase F0 subunit 8	cytoplasm	enzyme
	MTCH1	mitochondrial carrier 1	cytoplasm	other
	MTCH2	mitochondrial carrier 2	cytoplasm	other
	MT-CO1	cytochrome c oxidase subunit I	cytoplasm	enzyme
	MT-CO2	cytochrome c oxidase subunit II	cytoplasm	enzyme
	MT-CO3	cytochrome c oxidase III	cytoplasm	enzyme
	MTCP1	mature T cell proliferation 1	cytoplasm	other
	MT-CYB	cytochrome b	cytoplasm	enzyme
	MTERF	mitochondrial transcription termination factor 1	cytoplasm	transcription regulator
	MTERF1	mitochondrial transcription termination factor 1	cytoplasm	transcription regulator
	MTERF2	mitochondrial transcription termination factor 2	cytoplasm	transcription regulator
	MTERF3	mitochondrial transcription termination factor 3	cytoplasm	other
	MTERF4	mitochondrial transcription termination factor 4	cytoplasm	other
	MTERFD1	mitochondrial transcription termination factor 3	cytoplasm	other
	MTERFD2	mitochondrial transcription termination factor 4	cytoplasm	other
	MTERFD3	mitochondrial transcription termination factor 2	cytoplasm	transcription regulator
	MTFMT	mitochondrial methionyl-tRNA formyltransferase	cytoplasm	enzyme
	MTFP1	mitochondrial fission process 1	cytoplasm	other
	MTFR1	mitochondrial fission regulator 1	cytoplasm	other
	MTFR1L	mitochondrial fission regulator 1 like	other	other
	MTFR2	mitochondrial fission regulator 2	cytoplasm	other
	MTG1	mitochondrial ribosome associated GTPase 1	cytoplasm	enzyme
	MTG2	mitochondrial ribosome associated GTPase 2	cytoplasm	enzyme
	MTHFD1	methylenetetrahydrofolate dehydrogenase, cyclohydrolase and formyltetrahydrofolate synthetase 1	cytoplasm	enzyme
	MTHFD1L	methylenetetrahydrofolate dehydrogenase (NADP+ dependent) 1 like	cytoplasm	enzyme
	MTHFD2	methylenetetrahydrofolate dehydrogenase (NADP+ dependent) 2, methenyltetrahydrofolate cyclohydrolase	cytoplasm	enzyme
	MTHFD2L	methylenetetrahydrofolate dehydrogenase (NADP+ dependent) 2 like	cytoplasm	enzyme
	MTHFS	methenyltetrahydrofolate synthetase	cytoplasm	enzyme
	MTIF2	mitochondrial translational initiation factor 2	cytoplasm	translation regulator
	MTIF3	mitochondrial translational initiation factor 3	cytoplasm	translation regulator
	MT-ND1	NADH dehydrogenase, subunit 1 (complex I)	cytoplasm	enzyme
	MT-ND2	MTND2	cytoplasm	enzyme
	MT-ND3	NADH dehydrogenase, subunit 3 (complex I)	cytoplasm	enzyme
	MT-ND4	NADH dehydrogenase, subunit 4 (complex I)	cytoplasm	enzyme
	MT-ND4L	NADH dehydrogenase, subunit 4L (complex I)	cytoplasm	enzyme
	MT-ND5	NADH dehydrogenase, subunit 5 (complex I)	cytoplasm	enzyme
	MT-ND6	NADH dehydrogenase, subunit 6 (complex I)	cytoplasm	enzyme
	MTO1	mitochondrial tRNA translation optimization 1	cytoplasm	enzyme
	MTPAP	mitochondrial poly(A) polymerase	cytoplasm	enzyme
	MTRF1	mitochondrial translation release factor 1	cytoplasm	translation regulator
	MTRF1L	mitochondrial translational release factor 1 like	cytoplasm	translation regulator
	MT-RNR1	s-rRNA	cytoplasm	other
	MTX1	metaxin 1	cytoplasm	transporter
	MTX2	metaxin 2	cytoplasm	transporter
	MTX3	metaxin 3	other	other
	MUL1	mitochondrial E3 ubiquitin protein ligase 1	cytoplasm	enzyme
	MUT	methylmalonyl-CoA mutase	cytoplasm	enzyme
	MUTYH	mutY DNA glycosylase	nucleus	enzyme
	MYCBP	MYC binding protein	nucleus	transcription regulator
	MYH10	myosin heavy chain 10	cytoplasm	enzyme
	MYH9	myosin heavy chain 9	cytoplasm	enzyme
	MYL10	myosin light chain 10	cytoplasm	other
	MYL6	myosin light chain 6	cytoplasm	enzyme
	MYO19	myosin XIX	cytoplasm	enzyme
	MYOM2	myomesin 2	cytoplasm	other
	NADK	NAD kinase	cytoplasm	kinase
	NADK2	NAD kinase 2, mitochondrial	cytoplasm	kinase
	NADSYN1	NAD synthetase 1	cytoplasm	enzyme
	NAF1	nuclear assembly factor 1 ribonucleoprotein	cytoplasm	other
	NAGS	N-acetylglutamate synthase	cytoplasm	enzyme
	NAMPT	nicotinamide phosphoribosyltransferase	extracellular space	cytokine
	NAPG	NSF attachment protein gamma	cytoplasm	transporter
	NAPRT	nicotinate phosphoribosyltransferase	cytoplasm	enzyme
	NARS2	asparaginyl-tRNA synthetase 2, mitochondrial	cytoplasm	enzyme
	NAT8	N-acetyltransferase 8 (putative)	nucleus	transcription regulator
	NAT8B	N-acetyltransferase 8B (putative, gene/pseudogene)	cytoplasm	enzyme
	NAT8L	N-acetyltransferase 8 like	cytoplasm	enzyme
	NAV2	neuron navigator 2	nucleus	other
	NAXD	NAD(P)HX dehydratase	cytoplasm	enzyme
	NAXE	NAD(P)HX epimerase	extracellular space	enzyme
	NBR1	NBR1 autophagy cargo receptor	cytoplasm	other
	NCEH1	neutral cholesterol ester hydrolase 1	plasma membrane	enzyme
	NCOA4	nuclear receptor coactivator 4	nucleus	transcription regulator
	ND1	NADH dehydrogenase, subunit 1 (complex I)	cytoplasm	enzyme
	ND2	MTND2	cytoplasm	enzyme
	ND3	NADH dehydrogenase, subunit 3 (complex I)	cytoplasm	enzyme
	ND4	NADH dehydrogenase, subunit 4 (complex I)	cytoplasm	enzyme
	ND4L	NADH dehydrogenase, subunit 4L (complex I)	cytoplasm	enzyme
	ND5	NADH dehydrogenase, subunit 5 (complex I)	cytoplasm	enzyme
	ND6	NADH dehydrogenase, subunit 6 (complex I)	cytoplasm	enzyme
	NDUFA1	NADH:ubiquinone oxidoreductase subunit A1	cytoplasm	enzyme
	NDUFA10	NADH:ubiquinone oxidoreductase subunit A10	cytoplasm	transporter
	NDUFA11	NADH:ubiquinone oxidoreductase subunit A11	cytoplasm	enzyme
	NDUFA12	NADH:ubiquinone oxidoreductase subunit A12	cytoplasm	enzyme
	NDUFA13	NADH:ubiquinone oxidoreductase subunit A13	cytoplasm	enzyme
	NDUFA2	NADH:ubiquinone oxidoreductase subunit A2	cytoplasm	enzyme
	NDUFA3	NADH:ubiquinone oxidoreductase subunit A3	cytoplasm	enzyme
	NDUFA4	NDUFA4 mitochondrial complex associated	cytoplasm	enzyme
	NDUFA4L2	NDUFA4 mitochondrial complex associated like 2	other	enzyme
	NDUFA5	NADH:ubiquinone oxidoreductase subunit A5	cytoplasm	enzyme
	NDUFA6	NADH:ubiquinone oxidoreductase subunit A6	cytoplasm	enzyme
	NDUFA7	NADH:ubiquinone oxidoreductase subunit A7	cytoplasm	enzyme
	NDUFA8	NADH:ubiquinone oxidoreductase subunit A8	cytoplasm	enzyme
	NDUFA9	NADH:ubiquinone oxidoreductase subunit A9	cytoplasm	enzyme
	NDUFAB1	NADH:ubiquinone oxidoreductase subunit AB1	cytoplasm	enzyme
	NDUFAF1	NADH:ubiquinone oxidoreductase complex assembly factor 1	cytoplasm	other
	NDUFAF2	NADH:ubiquinone oxidoreductase complex assembly factor 2	cytoplasm	enzyme
	NDUFAF3	NADH:ubiquinone oxidoreductase complex assembly factor 3	nucleus	other
	NDUFAF4	NADH:ubiquinone oxidoreductase complex assembly factor 4	cytoplasm	other
	NDUFAF5	NADH:ubiquinone oxidoreductase complex assembly factor 5	cytoplasm	other
	NDUFAF6	NADH:ubiquinone oxidoreductase complex assembly factor 6	cytoplasm	other
	NDUFAF7	NADH:ubiquinone oxidoreductase complex assembly factor 7	cytoplasm	enzyme
	NDUFAF8	NADH:ubiquinone oxidoreductase complex assembly factor 8	cytoplasm	other
	NDUFB1	NADH:ubiquinone oxidoreductase subunit B1	cytoplasm	enzyme
	NDUFB10	NADH:ubiquinone oxidoreductase subunit B10	cytoplasm	enzyme
	NDUFB11	NADH:ubiquinone oxidoreductase subunit B11	cytoplasm	enzyme
	NDUFB2	NADH:ubiquinone oxidoreductase subunit B2	cytoplasm	enzyme
	NDUFB3	NADH:ubiquinone oxidoreductase subunit B3	cytoplasm	enzyme
	NDUFB4	NADH:ubiquinone oxidoreductase subunit B4	cytoplasm	transporter
	NDUFB5	NADH:ubiquinone oxidoreductase subunit B5	cytoplasm	enzyme
	NDUFB6	NADH:ubiquinone oxidoreductase subunit B6	cytoplasm	enzyme
	NDUFB7	NADH:ubiquinone oxidoreductase subunit B7	cytoplasm	enzyme
	NDUFB8	NADH:ubiquinone oxidoreductase subunit B8	cytoplasm	enzyme
	NDUFB9	NADH:ubiquinone oxidoreductase subunit B9	cytoplasm	enzyme
	NDUFC1	NADH:ubiquinone oxidoreductase subunit C1	cytoplasm	enzyme
	NDUFC2	NADH:ubiquinone oxidoreductase subunit C2	cytoplasm	enzyme
	NDUFC2-KCTD14	NDUFC2-KCTD14 readthrough	cytoplasm	other
	NDUFS1	NADH:ubiquinone oxidoreductase core subunit S1	cytoplasm	enzyme
	NDUFS2	NADH:ubiquinone oxidoreductase core subunit S2	cytoplasm	enzyme
	NDUFS3	NADH:ubiquinone oxidoreductase core subunit S3	cytoplasm	enzyme
	NDUFS4	NADH:ubiquinone oxidoreductase subunit S4	cytoplasm	enzyme
	NDUFS5	NADH:ubiquinone oxidoreductase subunit S5	cytoplasm	enzyme
	NDUFS6	NADH:ubiquinone oxidoreductase subunit S6	cytoplasm	enzyme
	NDUFS7	NADH:ubiquinone oxidoreductase core subunit S7	cytoplasm	enzyme
	NDUFS8	NADH:ubiquinone oxidoreductase core subunit S8	cytoplasm	enzyme
	NDUFV1	NADH:ubiquinone oxidoreductase core subunit V1	cytoplasm	enzyme
	NDUFV2	NADH:ubiquinone oxidoreductase core subunit V2	cytoplasm	enzyme
	NDUFV3	NADH:ubiquinone oxidoreductase subunit V3	cytoplasm	enzyme
	NEU4	neuraminidase 4	cytoplasm	enzyme
	NFS1	NFS1 cysteine desulfurase	cytoplasm	enzyme
	NFU1	NFU1 iron-sulfur cluster scaffold	cytoplasm	other
	NGB	neuroglobin	cytoplasm	transporter
	NGRN	neugrin, neurite outgrowth associated	nucleus	other
	NIF3L1	NGG1 interacting factor 3 like 1	cytoplasm	other
	NIPSNAP1	nipsnap homolog 1	cytoplasm	enzyme
	NIPSNAP2	nipsnap homolog 2	plasma membrane	other
	NIPSNAP3A	nipsnap homolog 3A	nucleus	other
	NIPSNAP3B	nipsnap homolog 3B	other	other
	NIT1	nitrilase 1	cytoplasm	enzyme
	NIT2	nitrilase family member 2	cytoplasm	enzyme
	NKTR	natural killer cell triggering receptor	plasma membrane	enzyme
	NLN	neurolysin	cytoplasm	peptidase
	NLRX1	NLR family member X1	cytoplasm	other
	NME1	NME/NM23 nucleoside diphosphate kinase 1	cytoplasm	kinase
	NME1-NME2	NME1-NME2 readthrough	cytoplasm	other
	NME2	NME/NM23 nucleoside diphosphate kinase 2	nucleus	kinase
	NME3	NME/NM23 nucleoside diphosphate kinase 3	cytoplasm	kinase
	NME4	NME/NM23 nucleoside diphosphate kinase 4	cytoplasm	kinase
	NME6	NME/NM23 nucleoside diphosphate kinase 6	cytoplasm	kinase
	NME7	NME/NM23 family member 7	cytoplasm	kinase
	NMNAT1	nicotinamide nucleotide adenylyltransferase 1	nucleus	enzyme
	NMNAT2	nicotinamide nucleotide adenylyltransferase 2	cytoplasm	enzyme
	NMNAT3	nicotinamide nucleotide adenylyltransferase 3	cytoplasm	enzyme
	NMRK1	nicotinamide riboside kinase 1	cytoplasm	kinase
	NMRK2	nicotinamide riboside kinase 2	plasma membrane	kinase
	NNMT	nicotinamide N-methyltransferase	cytoplasm	enzyme
	NNT	nicotinamide nucleotide transhydrogenase	cytoplasm	enzyme
	NOA1	nitric oxide associated 1	cytoplasm	other
	NOL3	nucleolar protein 3	nucleus	other
	NOL7	nucleolar protein 7	nucleus	other
	NOMO1	NODAL modulator 1	plasma membrane	other
	NOX4	NADPH oxidase 4	cytoplasm	enzyme
	NQO1	NAD(P)H quinone dehydrogenase 1	cytoplasm	enzyme
	NR3C1	nuclear receptor subfamily 3 group C member 1	nucleus	ligand-dependent nuclear receptor
	NRD1	nardilysin convertase	cytoplasm	peptidase
	NRF1	nuclear respiratory factor 1	nucleus	transcription regulator
	NRF2
	NSDHL	NAD(P) dependent steroid dehydrogenase-like	cytoplasm	enzyme
	NSUN3	NOP2/Sun RNA methyltransferase 3	cytoplasm	enzyme
	NSUN4	NOP2/Sun RNA methyltransferase 4	cytoplasm	enzyme
	NT5C	5', 3'-nucleotidase, cytosolic	cytoplasm	phosphatase
	NT5C1B	5'-nucleotidase, cytosolic IB	cytoplasm	phosphatase
	NT5C2	5'-nucleotidase, cytosolic II	cytoplasm	phosphatase
	NT5C3B	5'-nucleotidase, cytosolic IIIB	cytoplasm	phosphatase
	NT5DC2	5'-nucleotidase domain containing 2	cytoplasm	other
	NT5DC3	5'-nucleotidase domain containing 3	cytoplasm	other
	NT5M	5',3'-nucleotidase, mitochondrial	cytoplasm	phosphatase
	NTHL1	nth like DNA glycosylase 1	nucleus	enzyme
	NUBPL	nucleotide binding protein like	cytoplasm	other
	NUCB2	nucleobindin 2	nucleus	other
	NUDT12	nudix hydrolase 12	cytoplasm	phosphatase
	NUDT13	nudix hydrolase 13	cytoplasm	enzyme
	NUDT19	nudix hydrolase 19	cytoplasm	enzyme
	NUDT2	nudix hydrolase 2	plasma membrane	phosphatase
	NUDT5	nudix hydrolase 5	cytoplasm	phosphatase
	NUDT6	nudix hydrolase 6	extracellular space	enzyme
	NUDT8	nudix hydrolase 8	cytoplasm	other
	NUDT9	nudix hydrolase 9	cytoplasm	phosphatase
	OAS1	2'-5'-oligoadenylate synthetase 1	cytoplasm	enzyme
	OAT	ornithine aminotransferase	cytoplasm	enzyme
	OBSCN	obscurin, cytoskeletal calmodulin and titin-interacting RhoGEF	cytoplasm	kinase
	OCIAD1	OCIA domain containing 1	cytoplasm	other
	OCIAD2	OCIA domain containing 2	cytoplasm	other
	ODC1	ornithine decarboxylase 1	cytoplasm	enzyme
	OGDH	oxoglutarate dehydrogenase	cytoplasm	enzyme
	OGDHL	oxoglutarate dehydrogenase like	other	enzyme
	OGG1	8-oxoguanine DNA glycosylase	nucleus	enzyme
	OGT	O-linked N-acetylglucosamine (GlcNAc) transferase	cytoplasm	enzyme
	OLAH	oleoyl-ACP hydrolase	cytoplasm	enzyme
	OMA1	OMA1 zinc metallopeptidase	cytoplasm	peptidase
	OPA1	OPA1 mitochondrial dynamin like GTPase	cytoplasm	enzyme
	OPA3	outer mitochondrial membrane lipid metabolism regulator OPA3	cytoplasm	other
	OPLAH	5-oxoprolinase, ATP-hydrolysing	cytoplasm	enzyme
	OSBPL1A	oxysterol binding protein like 1A	cytoplasm	other
	OSGEPL1	O-sialoglycoprotein endopeptidase like 1	cytoplasm	peptidase
	OTC	ornithine carbamoyltransferase	cytoplasm	enzyme
	OTULIN	OTU deubiquitinase with linear linkage specificity	cytoplasm	peptidase
	OTX2	orthodenticle homeobox 2	nucleus	transcription regulator
	OXA1L	OXA1L mitochondrial inner membrane protein	cytoplasm	enzyme
	OXCT1	3-oxoacid CoA-transferase 1	cytoplasm	enzyme
	OXCT2	3-oxoacid CoA-transferase 2	cytoplasm	enzyme
	OXLD1	oxidoreductase like domain containing 1	cytoplasm	other
	OXNAD1	oxidoreductase NAD binding domain containing 1	cytoplasm	transporter
	OXR1	oxidation resistance 1	cytoplasm	enzyme
	OXSM	3-oxoacyl-ACP synthase, mitochondrial	cytoplasm	kinase
	P2RY1	purinergic receptor P2Y1	plasma membrane	G-protein coupled receptor
	P2RY12	purinergic receptor P2Y12	plasma membrane	G-protein coupled receptor
	P4HA1	prolyl 4-hydroxylase subunit alpha 1	cytoplasm	enzyme
	P4HB	prolyl 4-hydroxylase subunit beta	cytoplasm	enzyme
	PABPC5	poly(A) binding protein cytoplasmic 5	cytoplasm	other
	PACS2	phosphofurin acidic cluster sorting protein 2	cytoplasm	other
	PACSIN2	protein kinase C and casein kinase substrate in neurons 2	cytoplasm	transporter
	PAICS	phosphoribosylaminoimidazole carboxylase and phosphoribosylaminoimidazolesuccinocarboxamide synthase	cytoplasm	enzyme
	PAIP2B	poly(A) binding protein interacting protein 2B	other	translation regulator
	PAK5	p21 (RAC1) activated kinase 5	nucleus	kinase
	PAK7	p21 (RAC1) activated kinase 5	nucleus	kinase
	PAM16	presequence translocase associated motor 16	cytoplasm	other
	PANK2	pantothenate kinase 2	cytoplasm	kinase
	PAP	regenerating family member 3 alpha	extracellular space	enzyme
	PAPSS1	3'-phosphoadenosine 5'-phosphosulfate synthase 1	cytoplasm	enzyme
	PAPSS2	3'-phosphoadenosine 5'-phosphosulfate synthase 2	cytoplasm	enzyme
	PARK7	Parkinsonism associated deglycase	nucleus	enzyme
	PARL	presenilin associated rhomboid like	cytoplasm	peptidase
	PARP1	poly(ADP-ribose) polymerase 1	nucleus	enzyme
	PARS2	prolyl-tRNA synthetase 2, mitochondrial	cytoplasm	enzyme
	PAX2	paired box 2	nucleus	transcription regulator
	PC	pyruvate carboxylase	cytoplasm	enzyme
	PCBD2	pterin-4 alpha-carbinolamine dehydratase 2	nucleus	enzyme
	PCCA	propionyl-CoA carboxylase subunit alpha	cytoplasm	enzyme
	PCCB	propionyl-CoA carboxylase subunit beta	cytoplasm	enzyme
	PCK1	phosphoenolpyruvate carboxykinase 1	cytoplasm	kinase
	PCK2	phosphoenolpyruvate carboxykinase 2, mitochondrial	cytoplasm	kinase
	PCMT1	protein-L-isoaspartate (D-aspartate) O-methyltransferase	cytoplasm	enzyme
	PDE12	phosphodiesterase 12	cytoplasm	enzyme
	PDE2A	phosphodiesterase 2A	cytoplasm	enzyme
	PDF	peptide deformylase, mitochondrial	cytoplasm	enzyme
	PDHA1	pyruvate dehydrogenase E1 subunit alpha 1	cytoplasm	enzyme
	PDHA2	pyruvate dehydrogenase E1 subunit alpha 2	nucleus	enzyme
	PDHB	pyruvate dehydrogenase E1 subunit beta	cytoplasm	enzyme
	PDHX	pyruvate dehydrogenase complex component X	cytoplasm	enzyme
	PDIA3	protein disulfide isomerase family A member 3	cytoplasm	peptidase
	PDK1	pyruvate dehydrogenase kinase 1	cytoplasm	kinase
	PDK2	pyruvate dehydrogenase kinase 2	cytoplasm	kinase
	PDK3	pyruvate dehydrogenase kinase 3	cytoplasm	kinase
	PDK4	pyruvate dehydrogenase kinase 4	cytoplasm	kinase
	PDP1	pyruvate dehyrogenase phosphatase catalytic subunit 1	cytoplasm	phosphatase
	PDP2	pyruvate dehyrogenase phosphatase catalytic subunit 2	cytoplasm	phosphatase
	PDPR	pyruvate dehydrogenase phosphatase regulatory subunit	cytoplasm	enzyme
	PDSS1	decaprenyl diphosphate synthase subunit 1	cytoplasm	enzyme
	PDSS2	decaprenyl diphosphate synthase subunit 2	cytoplasm	enzyme
	PET100	PET100 cytochrome c oxidase chaperone	other	other
	PET112	glutamyl-tRNA amidotransferase subunit B	cytoplasm	enzyme
	PET117	PET117 cytochrome c oxidase chaperone	cytoplasm	other
	PEX11B	peroxisomal biogenesis factor 11 beta	cytoplasm	other
	PGAM5	PGAM family member 5, mitochondrial serine/threonine protein phosphatase	cytoplasm	enzyme
	PGC1
	PGD	phosphogluconate dehydrogenase	cytoplasm	enzyme
	PGK1	phosphoglycerate kinase 1	cytoplasm	kinase
	PGRMC2	progesterone receptor membrane component 2	nucleus	other
	PGS1	phosphatidylglycerophosphate synthase 1	cytoplasm	enzyme
	PHB	prohibitin	nucleus	transcription regulator
	PHB2	prohibitin 2	cytoplasm	transcription regulator
	PHKA1	phosphorylase kinase regulatory subunit alpha 1	cytoplasm	kinase
	PHYH	phytanoyl-CoA 2-hydroxylase	cytoplasm	enzyme
	PHYHIPL	phytanoyl-CoA 2-hydroxylase interacting protein like	cytoplasm	other
	PHYKPL	5-phosphohydroxy-L-lysine phospho-lyase	cytoplasm	enzyme
	PI4KA	phosphatidylinositol 4-kinase alpha	cytoplasm	kinase
	PICK1	protein interacting with PRKCA 1	cytoplasm	enzyme
	PIF1	PIF1 5'-to-3' DNA helicase	nucleus	enzyme
	PIN4	peptidylprolyl cis/trans isomerase, NIMA-interacting 4	nucleus	enzyme
	PINK1	PTEN induced kinase 1	cytoplasm	kinase
	PISD	phosphatidylserine decarboxylase	cytoplasm	enzyme
	PITRM1	pitrilysin metallopeptidase 1	cytoplasm	peptidase
	PJVK	pejvakin	other	other
	PKLR	pyruvate kinase L/R	cytoplasm	kinase
	PKM	pyruvate kinase M1/2	cytoplasm	kinase
	PLD6	phospholipase D family member 6	cytoplasm	enzyme
	PLGRKT	plasminogen receptor with a C-terminal lysine	cytoplasm	other
	PLIN5	perilipin 5	plasma membrane	other
	PLPBP	pyridoxal phosphate binding protein	cytoplasm	enzyme
	PMAIP1	phorbol-12-myristate-13-acetate-induced protein 1	cytoplasm	other
	PML	promyelocytic leukemia	nucleus	transcription regulator
	PMPCA	peptidase, mitochondrial processing subunit alpha	cytoplasm	peptidase
	PMPCB	peptidase, mitochondrial processing subunit beta	cytoplasm	peptidase
	PNKD	PNKD metallo-beta-lactamase domain containing	nucleus	other
	PNKP	polynucleotide kinase 3'-phosphatase	nucleus	kinase
	PNP	purine nucleoside phosphorylase	nucleus	enzyme
	PNPLA4	patatin like phospholipase domain containing 4	cytoplasm	enzyme
	PNPLA8	patatin like phospholipase domain containing 8	cytoplasm	enzyme
	PNPO	pyridoxamine 5'-phosphate oxidase	cytoplasm	enzyme
	PNPT1	polyribonucleotide nucleotidyltransferase 1	cytoplasm	enzyme
	POLDIP2	DNA polymerase delta interacting protein 2	cytoplasm	other
	POLG	DNA polymerase gamma, catalytic subunit	cytoplasm	enzyme
	POLG2	DNA polymerase gamma 2, accessory subunit	cytoplasm	enzyme
	POLRMT	RNA polymerase mitochondrial	cytoplasm	enzyme
	POR	cytochrome p450 oxidoreductase	cytoplasm	enzyme
	PP2A
	PPA1	inorganic pyrophosphatase 1	cytoplasm	enzyme
	PPA2	inorganic pyrophosphatase 2	cytoplasm	enzyme
	PPARG	peroxisome proliferator activated receptor gamma	nucleus	ligand-dependent nuclear receptor
	PPIB	peptidylprolyl isomerase B	cytoplasm	enzyme
	PPIF	peptidylprolyl isomerase F	cytoplasm	enzyme
	PPM1K	protein phosphatase, Mg2+/Mn2+ dependent 1K	cytoplasm	phosphatase
	PPOX	protoporphyrinogen oxidase	cytoplasm	enzyme
	PPP1CC	protein phosphatase 1 catalytic subunit gamma	nucleus	phosphatase
	PPP1R12B	protein phosphatase 1 regulatory subunit 12B	cytoplasm	phosphatase
	PPP1R14A	protein phosphatase 1 regulatory inhibitor subunit 14A	cytoplasm	phosphatase
	PPP1R15A	protein phosphatase 1 regulatory subunit 15A	cytoplasm	other
	PPP1R27	protein phosphatase 1 regulatory subunit 27	nucleus	transcription regulator
	PPT1	palmitoyl-protein thioesterase 1	cytoplasm	enzyme
	PPT2	palmitoyl-protein thioesterase 2	cytoplasm	enzyme
	PPTC7	protein phosphatase targeting COQ7	cytoplasm	phosphatase
	PPWD1	peptidylprolyl isomerase domain and WD repeat containing 1	nucleus	enzyme
	PRDX1	peroxiredoxin 1	cytoplasm	enzyme
	PRDX2	peroxiredoxin 2	cytoplasm	enzyme
	PRDX3	peroxiredoxin 3	cytoplasm	enzyme
	PRDX4	peroxiredoxin 4	cytoplasm	enzyme
	PRDX5	peroxiredoxin 5	cytoplasm	enzyme
	PRDX6	peroxiredoxin 6	cytoplasm	enzyme
	PRELID1	PRELI domain containing 1	cytoplasm	other
	PRELID2	PRELI domain containing 2	cytoplasm	other
	PRELID3A	PRELI domain containing 3A	cytoplasm	transporter
	PRELID3B	PRELI domain containing 3B	cytoplasm	other
	PREPL	prolyl endopeptidase like	other	peptidase
	PRIMPOL	primase and DNA directed polymerase	extracellular space	enzyme
	PRKACA	protein kinase cAMP-activated catalytic subunit alpha	cytoplasm	kinase
	PRKCA	protein kinase C alpha	cytoplasm	kinase
	PRKCE	protein kinase C epsilon	cytoplasm	kinase
	PRODH	proline dehydrogenase 1	cytoplasm	enzyme
	PRODH2	proline dehydrogenase 2	cytoplasm	enzyme
	PROSC	pyridoxal phosphate binding protein	cytoplasm	enzyme
	PRR5L	proline rich 5 like	cytoplasm	other
	PRSS35	serine protease 35	extracellular space	peptidase
	PRUNE2	prune homolog 2 with BCH domain	cytoplasm	other
	PSAP	prosaposin	extracellular space	enzyme
	PSEN1	presenilin 1	plasma membrane	peptidase
	PSMA6	proteasome 20S subunit alpha 6	cytoplasm	peptidase
	PSMB3	proteasome 20S subunit beta 3	cytoplasm	peptidase
	PSTK	phosphoseryl-tRNA kinase	cytoplasm	kinase
	PTCD1	pentatricopeptide repeat domain 1	cytoplasm	other
	PTCD2	pentatricopeptide repeat domain 2	cytoplasm	other
	PTCD3	pentatricopeptide repeat domain 3	cytoplasm	other
	PTCHD4	patched domain containing 4	other	other
	PTGES2	prostaglandin E synthase 2	cytoplasm	transcription regulator
	PTP
	PTPMT1	protein tyrosine phosphatase mitochondrial 1	cytoplasm	phosphatase
	PTPN11	protein tyrosine phosphatase non-receptor type 11	cytoplasm	phosphatase
	PTPN4	protein tyrosine phosphatase non-receptor type 4	cytoplasm	phosphatase
	PTRH1	peptidyl-tRNA hydrolase 1 homolog	cytoplasm	enzyme
	PTRH2	peptidyl-tRNA hydrolase 2	cytoplasm	enzyme
	PTS	6-pyruvoyltetrahydropterin synthase	cytoplasm	enzyme
	PUS1	pseudouridine synthase 1	nucleus	enzyme
	PUS10	pseudouridine synthase 10	other	other
	PUSL1	pseudouridine synthase like 1	other	enzyme
	PXMP2	peroxisomal membrane protein 2	cytoplasm	other
	PXMP4	peroxisomal membrane protein 4	cytoplasm	other
	PYCARD	PYD and CARD domain containing	cytoplasm	transcription regulator
	PYCR1	pyrroline-5-carboxylate reductase 1	cytoplasm	enzyme
	PYCR2	pyrroline-5-carboxylate reductase 2	cytoplasm	enzyme
	PYROXD2	pyridine nucleotide-disulphide oxidoreductase domain 2	other	other
	PYURF	PIGY upstream reading frame	cytoplasm	other
	QDPR	quinoid dihydropteridine reductase	cytoplasm	enzyme
	QPRT	quinolinate phosphoribosyltransferase	cytoplasm	enzyme
	QRSL1	glutaminyl-tRNA amidotransferase subunit QRSL1	cytoplasm	enzyme
	QSOX2	quiescin sulfhydryl oxidase 2	other	enzyme
	QTRT1	queuine tRNA-ribosyltransferase catalytic subunit 1	cytoplasm	enzyme
	QTRT2	queuine tRNA-ribosyltransferase accessory subunit 2	cytoplasm	enzyme
	RAB10	RAB10, member RAS oncogene family	cytoplasm	enzyme
	RAB11B	RAB11B, member RAS oncogene family	cytoplasm	enzyme
	RAB11FIP5	RAB11 family interacting protein 5	cytoplasm	other
	RAB1B	RAB1B, member RAS oncogene family	cytoplasm	other
	RAB21	RAB21, member RAS oncogene family	cytoplasm	enzyme
	RAB24	RAB24, member RAS oncogene family	cytoplasm	other
	RAB32	RAB32, member RAS oncogene family	cytoplasm	enzyme
	RAB35	RAB35, member RAS oncogene family	cytoplasm	enzyme
	RAB3A	RAB3A, member RAS oncogene family	cytoplasm	enzyme
	RAB3D	RAB3D, member RAS oncogene family	cytoplasm	enzyme
	RAB40AL	RAB40A like	plasma membrane	other
	RAB5C	RAB5C, member RAS oncogene family	cytoplasm	enzyme
	RAB7A	RAB7A, member RAS oncogene family	cytoplasm	enzyme
	RACK1	receptor for activated C kinase 1	cytoplasm	enzyme
	RAD51	RAD51 recombinase	nucleus	enzyme
	RAD51C	RAD51 paralog C	nucleus	enzyme
	RAI14	retinoic acid induced 14	nucleus	transcription regulator
	RALA	RAS like proto-oncogene A	cytoplasm	enzyme
	RANBP6	RAN binding protein 6	cytoplasm	other
	RAP1B	RAP1B, member of RAS oncogene family	cytoplasm	enzyme
	RARS	arginyl-tRNA synthetase 1	cytoplasm	enzyme
	RARS2	arginyl-tRNA synthetase 2, mitochondrial	cytoplasm	enzyme
	RBFA	ribosome binding factor A	cytoplasm	other
	RCC1L	RCC1 like	cytoplasm	other
	RCN2	reticulocalbin 2	cytoplasm	other
	RDH11	retinol dehydrogenase 11	cytoplasm	enzyme
	RDH13	retinol dehydrogenase 13	cytoplasm	enzyme
	RDH14	retinol dehydrogenase 14	cytoplasm	enzyme
	RECQL4	RecQ like helicase 4	nucleus	enzyme
	REM1	RRAD and GEM like GTPase 1	other	enzyme
	REXO2	RNA exonuclease 2	cytoplasm	enzyme
	RFK	riboflavin kinase	cytoplasm	kinase
	RHOA	ras homolog family member A	cytoplasm	enzyme
	RHOT1	ras homolog family member T1	cytoplasm	enzyme
	RHOT2	ras homolog family member T2	cytoplasm	enzyme
	RICTOR	RPTOR independent companion of MTOR complex 2	cytoplasm	other
	RIDA	reactive intermediate imine deaminase A homolog	cytoplasm	enzyme
	RIMS3	regulating synaptic membrane exocytosis 3	plasma membrane	other
	RIPK3	receptor interacting serine/threonine kinase 3	plasma membrane	kinase
	RMDN1	regulator of microtubule dynamics 1	cytoplasm	other
	RMDN3	regulator of microtubule dynamics 3	cytoplasm	other
	RMND1	required for meiotic nuclear division 1 homolog	cytoplasm	other
	RNASEH1	ribonuclease H1	nucleus	enzyme
	RNASEL	ribonuclease L	cytoplasm	enzyme
	RNASEP
	RNF144B	ring finger protein 144B	cytoplasm	enzyme
	RNF185	ring finger protein 185	cytoplasm	enzyme
	RNMTL1	mitochondrial rRNA methyltransferase 3	cytoplasm	enzyme
	ROMO1	reactive oxygen species modulator 1	cytoplasm	other
	RPIA	ribose 5-phosphate isomerase A	cytoplasm	enzyme
	RPL10	ribosomal protein L10	cytoplasm	translation regulator
	RPL10A	ribosomal protein L10a	nucleus	other
	RPL13	ribosomal protein L13	nucleus	other
	RPL18	ribosomal protein L18	cytoplasm	other
	RPL18A	ribosomal protein L18a	cytoplasm	other
	RPL23	ribosomal protein L23	cytoplasm	other
	RPL3	ribosomal protein L3	nucleus	other
	RPL30	ribosomal protein L30	cytoplasm	other
	RPL31	ribosomal protein L31	cytoplasm	other
	RPL32	ribosomal protein L32	cytoplasm	other
	RPL34	ribosomal protein L34	cytoplasm	other
	RPL35A	ribosomal protein L35a	cytoplasm	other
	RPL36	ribosomal protein L36	cytoplasm	other
	RPL4	ribosomal protein L4	cytoplasm	enzyme
	RPL5	ribosomal protein L5	cytoplasm	other
	RPL6	ribosomal protein L6	nucleus	other
	RPL7	ribosomal protein L7	nucleus	transcription regulator
	RPL8	ribosomal protein L8	cytoplasm	other
	RPLP0	ribosomal protein lateral stalk subunit P0	cytoplasm	other
	RPLP2	ribosomal protein lateral stalk subunit P2	cytoplasm	other
	RPN1	ribophorin I	cytoplasm	enzyme
	RPN2	ribophorin II	cytoplasm	enzyme
	RPS10	ribosomal protein S10	cytoplasm	other
	RPS13	ribosomal protein S13	cytoplasm	other
	RPS14	ribosomal protein S14	cytoplasm	translation regulator
	RPS15A	ribosomal protein S15a	cytoplasm	other
	RPS16	ribosomal protein S16	cytoplasm	other
	RPS17	ribosomal protein S17	cytoplasm	other
	RPS18	ribosomal protein S18	cytoplasm	other
	RPS19	ribosomal protein S19	cytoplasm	other
	RPS3	ribosomal protein S3	cytoplasm	enzyme
	RPS6KA6	ribosomal protein S6 kinase A6	cytoplasm	kinase
	RPS6KB1	ribosomal protein S6 kinase B1	cytoplasm	kinase
	RPS8	ribosomal protein S8	cytoplasm	other
	RPS9	ribosomal protein S9	cytoplasm	translation regulator
	RPUSD2	RNA pseudouridine synthase domain containing 2	other	enzyme
	RPUSD3	RNA pseudouridine synthase D3	other	other
	RPUSD4	RNA pseudouridine synthase D4	cytoplasm	other
	RRBP1	ribosome binding protein 1	cytoplasm	other
	RRM1	ribonucleotide reductase catalytic subunit M1	nucleus	enzyme
	RRM2	ribonucleotide reductase regulatory subunit M2	nucleus	enzyme
	RRM2B	ribonucleotide reductase regulatory TP53 inducible subunit M2B	nucleus	enzyme
	RSAD1	radical S-adenosyl methionine domain containing 1	cytoplasm	other
	RTKN	rhotekin	cytoplasm	other
	RTN4IP1	reticulon 4 interacting protein 1	cytoplasm	enzyme
	RUNDC3B	RUN domain containing 3B	other	other
	RUVBL2	RuvB like AAA ATPase 2	nucleus	transcription regulator
	SAC1
	SACM1L	SAC1 like phosphatidylinositide phosphatase	cytoplasm	phosphatase
	SAMM50	SAMM50 sorting and assembly machinery component	cytoplasm	other
	SAR1A	secretion associated Ras related GTPase 1A	cytoplasm	enzyme
	SAR1B	secretion associated Ras related GTPase 1B	cytoplasm	enzyme
	SARDH	sarcosine dehydrogenase	cytoplasm	enzyme
	SARM1	sterile alpha and TIR motif containing 1	plasma membrane	transmembrane receptor
	SARS2	seryl-tRNA synthetase 2, mitochondrial	cytoplasm	enzyme
	SAT2	spermidine/spermine N1-acetyltransferase family member 2	plasma membrane	enzyme
	SC5D	sterol-C5-desaturase	cytoplasm	enzyme
	SCARB2	scavenger receptor class B member 2	plasma membrane	transmembrane receptor
	SCCPDH	saccharopine dehydrogenase (putative)	cytoplasm	other
	SCO1	synthesis of cytochrome C oxidase 1	cytoplasm	other
	SCO2	synthesis of cytochrome C oxidase 2	cytoplasm	enzyme
	SCP2	sterol carrier protein 2	cytoplasm	transporter
	SDHA	succinate dehydrogenase complex flavoprotein subunit A	cytoplasm	enzyme
	SDHAF1	succinate dehydrogenase complex assembly factor 1	cytoplasm	other
	SDHAF2	succinate dehydrogenase complex assembly factor 2	extracellular space	other
	SDHAF3	succinate dehydrogenase complex assembly factor 3	cytoplasm	other
	SDHAF4	succinate dehydrogenase complex assembly factor 4	cytoplasm	enzyme
	SDHB	succinate dehydrogenase complex iron sulfur subunit B	cytoplasm	enzyme
	SDHC	succinate dehydrogenase complex subunit C	cytoplasm	enzyme
	SDHD	succinate dehydrogenase complex subunit D	cytoplasm	enzyme
	SDR39U1	short chain dehydrogenase/reductase family 39U member 1	nucleus	other
	SDS	serine dehydratase	cytoplasm	enzyme
	SDSL	serine dehydratase like	cytoplasm	enzyme
	SECISBP2	SECIS binding protein 2	cytoplasm	translation regulator
	SELENOO	selenoprotein O	extracellular space	enzyme
	SELO
	SEPT4	septin 4	cytoplasm	enzyme
	SERAC1	serine active site containing 1	extracellular space	other
	SERHL2	serine hydrolase like 2	cytoplasm	enzyme
	SETD9	SET domain containing 9	nucleus	enzyme
	SFXN1	sideroflexin 1	cytoplasm	transporter
	SFXN2	sideroflexin 2	cytoplasm	transporter
	SFXN3	sideroflexin 3	cytoplasm	transporter
	SFXN4	sideroflexin 4	cytoplasm	transporter
	SFXN5	sideroflexin 5	cytoplasm	transporter
	SH3BP5	SH3 domain binding protein 5	cytoplasm	other
	SH3GLB1	SH3 domain containing GRB2 like, endophilin B1	cytoplasm	enzyme
	SHC1	SHC adaptor protein 1	cytoplasm	other
	SHMT1	serine hydroxymethyltransferase 1	cytoplasm	enzyme
	SHMT2	serine hydroxymethyltransferase 2	cytoplasm	enzyme
	SIAH3	siah E3 ubiquitin protein ligase family member 3	cytoplasm	other
	SIRT3	sirtuin 3	cytoplasm	enzyme
	SIRT4	sirtuin 4	cytoplasm	enzyme
	SIRT5	sirtuin 5	cytoplasm	enzyme
	SLC11A2	solute carrier family 11 member 2	plasma membrane	transporter
	SLC16A1	solute carrier family 16 member 1	plasma membrane	transporter
	SLC16A11	solute carrier family 16 member 11	cytoplasm	transporter
	SLC16A7	solute carrier family 16 member 7	plasma membrane	transporter
	SLC22A4	solute carrier family 22 member 4	plasma membrane	transporter
	SLC24A6	solute carrier family 8 member B1	plasma membrane	transporter
	SLC25A1	solute carrier family 25 member 1	other	transporter
	SLC25A10	solute carrier family 25 member 10	cytoplasm	transporter
	SLC25A11	solute carrier family 25 member 11	cytoplasm	transporter
	SLC25A12	solute carrier family 25 member 12	cytoplasm	transporter
	SLC25A13	solute carrier family 25 member 13	cytoplasm	transporter
	SLC25A14	solute carrier family 25 member 14	cytoplasm	transporter
	SLC25A15	solute carrier family 25 member 15	cytoplasm	transporter
	SLC25A16	solute carrier family 25 member 16	cytoplasm	transporter
	SLC25A17	solute carrier family 25 member 17	cytoplasm	transporter
	SLC25A18	solute carrier family 25 member 18	cytoplasm	transporter
	SLC25A19	solute carrier family 25 member 19	cytoplasm	transporter
	SLC25A2	solute carrier family 25 member 2	cytoplasm	transporter
	SLC25A20	solute carrier family 25 member 20	cytoplasm	transporter
	SLC25A21	solute carrier family 25 member 21	cytoplasm	transporter
	SLC25A22	solute carrier family 25 member 22	cytoplasm	transporter
	SLC25A23	solute carrier family 25 member 23	cytoplasm	transporter
	SLC25A24	solute carrier family 25 member 24	cytoplasm	transporter
	SLC25A25	solute carrier family 25 member 25	cytoplasm	transporter
	SLC25A26	solute carrier family 25 member 26	cytoplasm	transporter
	SLC25A27	solute carrier family 25 member 27	cytoplasm	transporter
	SLC25A28	solute carrier family 25 member 28	cytoplasm	transporter
	SLC25A29	solute carrier family 25 member 29	cytoplasm	transporter
	SLC25A3	solute carrier family 25 member 3	cytoplasm	transporter
	SLC25A30	solute carrier family 25 member 30	cytoplasm	other
	SLC25A31	solute carrier family 25 member 31	cytoplasm	transporter
	SLC25A32	solute carrier family 25 member 32	cytoplasm	transporter
	SLC25A33	solute carrier family 25 member 33	cytoplasm	transporter
	SLC25A34	solute carrier family 25 member 34	cytoplasm	other
	SLC25A35	solute carrier family 25 member 35	cytoplasm	other
	SLC25A36	solute carrier family 25 member 36	cytoplasm	transporter
	SLC25A37	solute carrier family 25 member 37	cytoplasm	transporter
	SLC25A38	solute carrier family 25 member 38	cytoplasm	other
	SLC25A39	solute carrier family 25 member 39	cytoplasm	other
	SLC25A4	solute carrier family 25 member 4	cytoplasm	transporter
	SLC25A40	solute carrier family 25 member 40	cytoplasm	other
	SLC25A41	solute carrier family 25 member 41	cytoplasm	other
	SLC25A42	solute carrier family 25 member 42	cytoplasm	transporter
	SLC25A43	solute carrier family 25 member 43	cytoplasm	transporter
	SLC25A44	solute carrier family 25 member 44	cytoplasm	transporter
	SLC25A45	solute carrier family 25 member 45	cytoplasm	transporter
	SLC25A46	solute carrier family 25 member 46	cytoplasm	other
	SLC25A47	solute carrier family 25 member 47	cytoplasm	other
	SLC25A48	solute carrier family 25 member 48	other	other
	SLC25A5	solute carrier family 25 member 5	cytoplasm	transporter
	SLC25A51	solute carrier family 25 member 51	cytoplasm	other
	SLC25A52	solute carrier family 25 member 52	other	other
	SLC25A53	solute carrier family 25 member 53	other	other
	SLC25A6	solute carrier family 25 member 6	cytoplasm	transporter
	SLC27A1	solute carrier family 27 member 1	plasma membrane	transporter
	SLC27A2	solute carrier family 27 member 2	cytoplasm	transporter
	SLC27A3	solute carrier family 27 member 3	cytoplasm	transporter
	SLC30A6	solute carrier family 30 member 6	cytoplasm	transporter
	SLC30A9	solute carrier family 30 member 9	nucleus	transporter
	SLC35B3	solute carrier family 35 member B3	cytoplasm	transporter
	SLC35E1	solute carrier family 35 member E1	cytoplasm	other
	SLC35F6	solute carrier family 35 member F6	cytoplasm	other
	SLC37A4	solute carrier family 37 member 4	cytoplasm	transporter
	SLC44A1	solute carrier family 44 member 1	plasma membrane	transporter
	SLC44A5	solute carrier family 44 member 5	plasma membrane	transporter
	SLC8A3	solute carrier family 8 member A3	plasma membrane	transporter
	SLC8B1	solute carrier family 8 member B1	plasma membrane	transporter
	SLC9A6	solute carrier family 9 member A6	plasma membrane	transporter
	SLC9B2	solute carrier family 9 member B2	plasma membrane	transporter
	SLIRP	SRA stem-loop interacting RNA binding protein	cytoplasm	other
	SLIT3	slit guidance ligand 3	extracellular space	other
	SLMO1	PRELI domain containing 3A	cytoplasm	transporter
	SLMO2	PRELI domain containing 3B	cytoplasm	other
	SMAC
	SMCP	sperm mitochondria associated cysteine rich protein	cytoplasm	other
	SMDT1	single-pass membrane protein with aspartate rich tail 1	extracellular space	other
	SMIM12	small integral membrane protein 12	other	other
	SMIM20	small integral membrane protein 20	cytoplasm	other
	SMIM4	small integral membrane protein 4	cytoplasm	other
	SMIM8	small integral membrane protein 8	other	other
	SMS	spermine synthase	cytoplasm	enzyme
	SMURF1	SMAD specific E3 ubiquitin protein ligase 1	cytoplasm	enzyme
	SMYD5	SMYD family member 5	other	other
	SNAP29	synaptosome associated protein 29	cytoplasm	other
	SNCA	synuclein alpha	cytoplasm	enzyme
	SND1	staphylococcal nuclease and tudor domain containing 1	nucleus	enzyme
	SNPH	syntaphilin	plasma membrane	other
	SOAT1	sterol O-acyltransferase 1	cytoplasm	enzyme
	SOAT2	sterol O-acyltransferase 2	cytoplasm	enzyme
	SOD1	superoxide dismutase 1	cytoplasm	enzyme
	SOD2	superoxide dismutase 2	cytoplasm	enzyme
	SPART	spartin	cytoplasm	other
	SPATA18	spermatogenesis associated 18	cytoplasm	other
	SPATA19	spermatogenesis associated 19	other	other
	SPATA20	spermatogenesis associated 20	other	other
	SPATA2L	spermatogenesis associated 2 like	other	other
	SPATA5	spermatogenesis associated 5	cytoplasm	other
	SPCS2	signal peptidase complex subunit 2	cytoplasm	other
	SPG7	SPG7 matrix AAA peptidase subunit, paraplegin	cytoplasm	peptidase
	SPHKAP	SPHK1 interactor, AKAP domain containing	cytoplasm	other
	SPNS1	sphingolipid transporter 1 (putative)	cytoplasm	transporter
	SPR	sepiapterin reductase	cytoplasm	enzyme
	SPRYD4	SPRY domain containing 4	cytoplasm	other
	SPSB3	splA/ryanodine receptor domain and SOCS box containing 3	cytoplasm	other
	SPTLC2	serine palmitoyltransferase long chain base subunit 2	cytoplasm	enzyme
	SQLE	squalene epoxidase	cytoplasm	enzyme
	SQOR	sulfide quinone oxidoreductase	cytoplasm	enzyme
	SQRDL	sulfide quinone oxidoreductase	cytoplasm	enzyme
	SRBD1	S1 RNA binding domain 1	extracellular space	other
	SRC	SRC proto-oncogene, non-receptor tyrosine kinase	cytoplasm	kinase
	SRD5A1	steroid 5 alpha-reductase 1	cytoplasm	enzyme
	SRD5A2	steroid 5 alpha-reductase 2	cytoplasm	enzyme
	SRD5A3	steroid 5 alpha-reductase 3	cytoplasm	enzyme
	SRM	spermidine synthase	cytoplasm	enzyme
	SRPRB	SRP receptor subunit beta	cytoplasm	other
	SSBP1	single stranded DNA binding protein 1	cytoplasm	other
	SSR4	signal sequence receptor subunit 4	cytoplasm	other
	STAR	steroidogenic acute regulatory protein	cytoplasm	transporter
	STARD13	StAR related lipid transfer domain containing 13	cytoplasm	other
	STARD7	StAR related lipid transfer domain containing 7	cytoplasm	other
	STAT3	signal transducer and activator of transcription 3	nucleus	transcription regulator
	STOM	stomatin	plasma membrane	other
	STOML1	stomatin like 1	other	other
	STOML2	stomatin like 2	plasma membrane	other
	STS	steroid sulfatase	cytoplasm	enzyme
	STX17	syntaxin 17	plasma membrane	transporter
	STXBP1	syntaxin binding protein 1	cytoplasm	transporter
	SUCLA2	succinate-CoA ligase ADP-forming subunit beta	cytoplasm	enzyme
	SUCLG1	succinate-CoA ligase GDP/ADP-forming subunit alpha	cytoplasm	enzyme
	SUCLG2	succinate-CoA ligase GDP-forming subunit beta	cytoplasm	enzyme
	SUGCT	succinyl-CoA:glutarate-CoA transferase	cytoplasm	enzyme
	SULT1E1	sulfotransferase family 1E member 1	cytoplasm	enzyme
	SULT2B1	sulfotransferase family 2B member 1	cytoplasm	enzyme
	SUOX	sulfite oxidase	cytoplasm	enzyme
	SUPV3L1	Suv3 like RNA helicase	cytoplasm	enzyme
	SURF1	SURF1 cytochrome c oxidase assembly factor	cytoplasm	enzyme
	SUV3
	SYBU	syntabulin	cytoplasm	other
	SYNJ2BP	synaptojanin 2 binding protein	cytoplasm	other
	TACO1	translational activator of cytochrome c oxidase I	cytoplasm	other
	TAF3	TATA-box binding protein associated factor 3	nucleus	transcription regulator
	TAL2	TAL bHLH transcription factor 2	other	other
	TAMM41	TAM41 mitochondrial translocator assembly and maintenance homolog	cytoplasm	enzyme
	TANC2	tetratricopeptide repeat, ankyrin repeat and coiled-coil containing 2	nucleus	transcription regulator
	TANGO2	transport and golgi organization 2 homolog	cytoplasm	other
	TARS	threonyl-tRNA synthetase 1	nucleus	enzyme
	TARS2	threonyl-tRNA synthetase 2, mitochondrial	cytoplasm	enzyme
	TAT	tyrosine aminotransferase	cytoplasm	enzyme
	TAZ	tafazzin	nucleus	enzyme
	TBC1D15	TBC1 domain family member 15	cytoplasm	other
	TBC1D32	TBC1 domain family member 32	other	other
	TBC1D9	TBC1 domain family member 9	plasma membrane	other
	TBC1D9B	TBC1 domain family member 9B	other	other
	TBRG4	transforming growth factor beta regulator 4	cytoplasm	other
	TCAIM	T cell activation inhibitor, mitochondrial	cytoplasm	other
	TCHP	trichoplein keratin filament binding	cytoplasm	other
	TCIRG1	T cell immune regulator 1, ATPase H+ transporting V0 subunit a3	plasma membrane	enzyme
	TDRD7	tudor domain containing 7	cytoplasm	other
	TDRKH	tudor and KH domain containing	cytoplasm	other
	TECR	trans-2,3-enoyl-CoA reductase	plasma membrane	enzyme
	TEFM	transcription elongation factor, mitochondrial	cytoplasm	transcription regulator
	TERT	telomerase reverse transcriptase	nucleus	enzyme
	TEX47	testis expressed 47	other	other
	TFAM	transcription factor A, mitochondrial	cytoplasm	transcription regulator
	TFB1M	transcription factor B1, mitochondrial	cytoplasm	transcription regulator
	TFB2M	transcription factor B2, mitochondrial	cytoplasm	enzyme
	TFRC	transferrin receptor	plasma membrane	transporter
	THAP3	THAP domain containing 3	nucleus	transcription regulator
	THEM4	thioesterase superfamily member 4	plasma membrane	enzyme
	THEM5	thioesterase superfamily member 5	cytoplasm	enzyme
	THG1L	tRNA-histidine guanylyltransferase 1 like	cytoplasm	enzyme
	THNSL1	threonine synthase like 1	nucleus	kinase
	TIMM10	translocase of inner mitochondrial membrane 10	cytoplasm	transporter
	TIMM10B	translocase of inner mitochondrial membrane 10B	cytoplasm	transporter
	TIMM13	translocase of inner mitochondrial membrane 13	cytoplasm	transporter
	TIMM17A	translocase of inner mitochondrial membrane 17A	cytoplasm	transporter
	TIMM17B	translocase of inner mitochondrial membrane 17B	cytoplasm	transporter
	TIMM21	translocase of inner mitochondrial membrane 21	cytoplasm	other
	TIMM22	translocase of inner mitochondrial membrane 22	cytoplasm	transporter
	TIMM23	translocase of inner mitochondrial membrane 23	cytoplasm	transporter
	TIMM23B	translocase of inner mitochondrial membrane 23 homolog B	cytoplasm	other
	TIMM29	translocase of inner mitochondrial membrane 29	cytoplasm	other
	TIMM44	translocase of inner mitochondrial membrane 44	cytoplasm	transporter
	TIMM50	translocase of inner mitochondrial membrane 50	cytoplasm	phosphatase
	TIMM8A	translocase of inner mitochondrial membrane 8A	cytoplasm	transporter
	TIMM8B	translocase of inner mitochondrial membrane 8 homolog B	cytoplasm	transporter
	TIMM9	translocase of inner mitochondrial membrane 9	cytoplasm	transporter
	TIMMDC1	translocase of inner mitochondrial membrane domain containing 1	cytoplasm	other
	TK1	thymidine kinase 1	cytoplasm	kinase
	TK2	thymidine kinase 2	cytoplasm	kinase
	TKT	transketolase	cytoplasm	enzyme
	TM7SF2	transmembrane 7 superfamily member 2	cytoplasm	enzyme
	TM9SF4	transmembrane 9 superfamily member 4	cytoplasm	transporter
	TMBIM4	transmembrane BAX inhibitor motif containing 4	nucleus	other
	TMBIM6	transmembrane BAX inhibitor motif containing 6	nucleus	other
	TMED10	transmembrane p24 trafficking protein 10	cytoplasm	transporter
	TMED9	transmembrane p24 trafficking protein 9	cytoplasm	transporter
	TMEM11	transmembrane protein 11	plasma membrane	G-protein coupled receptor
	TMEM126A	transmembrane protein 126A	cytoplasm	other
	TMEM126B	transmembrane protein 126B	cytoplasm	other
	TMEM141	transmembrane protein 141	other	other
	TMEM143	transmembrane protein 143	cytoplasm	other
	TMEM144	transmembrane protein 144	other	other
	TMEM14C	transmembrane protein 14C	plasma membrane	other
	TMEM160	transmembrane protein 160	cytoplasm	other
	TMEM177	transmembrane protein 177	cytoplasm	other
	TMEM186	transmembrane protein 186	cytoplasm	other
	TMEM205	transmembrane protein 205	cytoplasm	other
	TMEM223	transmembrane protein 223	other	other
	TMEM242	transmembrane protein 242	other	other
	TMEM246	post-GPI attachment to proteins GalNAc transferase 4	cytoplasm	enzyme
	TMEM256	transmembrane protein 256	cytoplasm	other
	TMEM263	transmembrane protein 263	other	other
	TMEM65	transmembrane protein 65	cytoplasm	other
	TMEM69	transmembrane protein 69	other	other
	TMEM70	transmembrane protein 70	cytoplasm	other
	TMLHE	trimethyllysine hydroxylase, epsilon	cytoplasm	enzyme
	TMTC1	transmembrane O-mannosyltransferase targeting cadherins 1	cytoplasm	enzyme
	TMTC3	transmembrane O-mannosyltransferase targeting cadherins 3	cytoplasm	enzyme
	TMX1	thioredoxin related transmembrane protein 1	cytoplasm	enzyme
	TMX2	thioredoxin related transmembrane protein 2	other	enzyme
	TOMM20	translocase of outer mitochondrial membrane 20	cytoplasm	transporter
	TOMM20L	translocase of outer mitochondrial membrane 20 like	other	other
	TOMM22	translocase of outer mitochondrial membrane 22	cytoplasm	transporter
	TOMM34	translocase of outer mitochondrial membrane 34	cytoplasm	other
	TOMM40	translocase of outer mitochondrial membrane 40	cytoplasm	ion channel
	TOMM40L	translocase of outer mitochondrial membrane 40 like	cytoplasm	other
	TOMM5	translocase of outer mitochondrial membrane 5	cytoplasm	other
	TOMM6	translocase of outer mitochondrial membrane 6	cytoplasm	other
	TOMM7	translocase of outer mitochondrial membrane 7	cytoplasm	transporter
	TOMM70	translocase of outer mitochondrial membrane 70	cytoplasm	transporter
	TOMM70A	translocase of outer mitochondrial membrane 70	cytoplasm	transporter
	TOP1MT	DNA topoisomerase I mitochondrial	cytoplasm	enzyme
	TOP3A	DNA topoisomerase III alpha	nucleus	enzyme
	TP53AIP1	tumor protein p53 regulated apoptosis inducing protein 1	cytoplasm	other
	TPI1	triosephosphate isomerase 1	cytoplasm	enzyme
	TPP1	tripeptidyl peptidase 1	cytoplasm	peptidase
	TRABD	TraB domain containing	extracellular space	other
	TRAF6	TNF receptor associated factor 6	cytoplasm	enzyme
	TRAP1	TNF receptor associated protein 1	cytoplasm	enzyme
	TRIAP1	TP53 regulated inhibitor of apoptosis 1	cytoplasm	other
	TRIM42	tripartite motif containing 42	other	other
	TRIT1	tRNA isopentenyltransferase 1	cytoplasm	enzyme
	TRMT1	tRNA methyltransferase 1	extracellular space	enzyme
	TRMT10C	tRNA methyltransferase 10C, mitochondrial RNase P subunit	cytoplasm	enzyme
	TRMT11	tRNA methyltransferase 11 homolog	other	enzyme
	TRMT2B	tRNA methyltransferase 2 homolog B	cytoplasm	enzyme
	TRMT5	tRNA methyltransferase 5	cytoplasm	other
	TRMT61B	tRNA methyltransferase 61B	cytoplasm	enzyme
	TRMU	tRNA 5-methylaminomethyl-2-thiouridylate methyltransferase	cytoplasm	enzyme
	TRNT1	tRNA nucleotidyl transferase 1	cytoplasm	enzyme
	TRPC4AP	transient receptor potential cation channel subfamily C member 4 associated protein	cytoplasm	transporter
	TRUB2	TruB pseudouridine synthase family member 2	cytoplasm	enzyme
	TSFM	Ts translation elongation factor, mitochondrial	cytoplasm	translation regulator
	TSPO	translocator protein	cytoplasm	transmembrane receptor
	TSPOAP1	TSPO associated protein 1	cytoplasm	other
	TST	thiosulfate sulfurtransferase	cytoplasm	enzyme
	TSTD1	thiosulfate sulfurtransferase like domain containing 1	cytoplasm	enzyme
	TSTD3	thiosulfate sulfurtransferase like domain containing 3	other	other
	TTC19	tetratricopeptide repeat domain 19	cytoplasm	other
	TTC24	tetratricopeptide repeat domain 24	other	other
	TTC32	tetratricopeptide repeat domain 32	other	other
	TUBA1A	tubulin alpha 1a	cytoplasm	other
	TUBB	tubulin beta class I	cytoplasm	other
	TUBB3	tubulin beta 3 class III	cytoplasm	other
	TUFM	Tu translation elongation factor, mitochondrial	cytoplasm	translation regulator
	TUSC2	tumor suppressor 2, mitochondrial calcium regulator	nucleus	other
	TUSC3	tumor suppressor candidate 3	plasma membrane	transporter
	TWINKLE
	TWNK	twinkle mtDNA helicase	cytoplasm	enzyme
	TXN2	thioredoxin 2	cytoplasm	enzyme
	TXNDC12	thioredoxin domain containing 12	cytoplasm	enzyme
	TXNRD1	thioredoxin reductase 1	cytoplasm	enzyme
	TXNRD2	thioredoxin reductase 2	cytoplasm	enzyme
	TYMP	thymidine phosphorylase	extracellular space	growth factor
	TYMS	thymidylate synthetase	nucleus	enzyme
	TYSND1	trypsin domain containing 1	cytoplasm	peptidase
	UBA1	ubiquitin like modifier activating enzyme 1	cytoplasm	enzyme
	UBE2H	ubiquitin conjugating enzyme E2 H	cytoplasm	enzyme
	UBE2N	ubiquitin conjugating enzyme E2 N	cytoplasm	enzyme
	UBE3B	ubiquitin protein ligase E3B	extracellular space	enzyme
	UBIAD1	UbiA prenyltransferase domain containing 1	nucleus	enzyme
	UBL4B	ubiquitin like 4B	other	other
	UCK1	uridine-cytidine kinase 1	cytoplasm	kinase
	UCK2	uridine-cytidine kinase 2	cytoplasm	kinase
	UCKL1	uridine-cytidine kinase 1 like 1	cytoplasm	kinase
	UCP1	uncoupling protein 1	cytoplasm	transporter
	UCP2	uncoupling protein 2	cytoplasm	transporter
	UCP3	uncoupling protein 3	cytoplasm	transporter
	UGT1A1	UDP glucuronosyltransferase family 1 member A1	cytoplasm	enzyme
	UGT1A10	UDP glucuronosyltransferase family 1 member A9	cytoplasm	enzyme
	UGT1A3	UDP glucuronosyltransferase family 1 member A3	cytoplasm	enzyme
	UGT1A4	UDP glucuronosyltransferase family 1 member A4	cytoplasm	enzyme
	UGT1A5	UDP glucuronosyltransferase family 1 member A5	cytoplasm	enzyme
	UGT1A6	UDP glucuronosyltransferase family 1 member A6	cytoplasm	enzyme
	UGT1A7	UDP glucuronosyltransferase family 1 member A9	cytoplasm	enzyme
[truncated: 84 more rows]
